1 ***iucn\_sim*: A new program to simulate future extinctions based on**  
2 **IUCN threat status**

3 **Author information**

4 Tobias Andermann <sup>1,2,\*</sup>, Søren Faurby <sup>1,2</sup>, Robert Cooke <sup>1,2</sup>, Daniele Silvestro <sup>1,2,\*\*</sup>, Alexandre  
5 Antonelli <sup>1,2,3,\*\*</sup>

6

7 <sup>1</sup> Department of Biological and Environmental Sciences, University of Gothenburg,  
8 Göteborg, Sweden

9 <sup>2</sup> Gothenburg Global Biodiversity Centre, Göteborg, Sweden

10 <sup>3</sup> Royal Botanic Gardens, Kew, Richmond, UK

11

12 \* Corresponding author. Email: [tobias.andermann@bioenv.gu.se](mailto:tobias.andermann@bioenv.gu.se), ORCID-ID:  
13 <https://orcid.org/0000-0002-0932-1623>

14 \*\* Joint last authorship

15

16 **Abstract**

17 The ongoing environmental crisis poses an urgent need to forecast the *who*, *where*, and *when*  
18 of future species extinctions, as such information is crucial for targeting conservation efforts.  
19 Commonly, such forecasts are made based on conservation status assessments produced by  
20 the International Union for Conservation of Nature (IUCN). However, when researchers  
21 apply these IUCN conservation status data for predicting future extinctions, important  
22 information is often omitted, which can impact the accuracy of these predictions.

23 Here we present a new approach and a software for simulating future extinctions based on  
24 IUCN conservation status information, which incorporates generation length information of  
25 individual species when modeling extinction risks. Additionally, we explicitly model future  
26 changes in conservation status for each species, based on status transition rates that we  
27 estimate from the IUCN assessment history of the last decades. Finally, we apply a Markov  
28 chain Monte Carlo algorithm to estimate extinction rates for each species, based on the  
29 simulated future extinctions. These estimates inherently incorporate the chances of  
30 conservation status changes and the generation length for each given species and are specific  
31 to the simulated time frame.

32 We demonstrate the utility of our approach by estimating extinction rates for all bird species.  
33 Our average extinction risk estimate for the next 100 years across all birds is  $6.98 \times 10^{-4}$   
34 extinctions per species-year, and we predict an expected biodiversity loss of between 669 to  
35 738 bird species within that time frame. Further, the rate estimates between species sharing  
36 the same IUCN status show larger variation than the rates estimated with alternative  
37 approaches, which reflects expected differences in extinction risk among taxa of the same  
38 conservation status. Our method demonstrates the utility of applying species-specific  
39 information to the estimation of extinction rates, rather than assuming equal extinction risks  
40 for species assigned to the same conservation status.

## 41 **Keywords**

42 Aves, Bayesian, Death process, Biodiversity loss, Extinction risk, Generation length, IUCN,  
43 MCMC, Conservation status, Red List

## 44 **Introduction**

45 We are in the middle of a massive biodiversity crisis (Barnosky et al. 2011, Davis et al. 2018,  
46 Díaz et al. 2019). Extinction risks have been steadily increasing for as long as we have been  
47 keeping record, with no indications of a slowdown (Ceballos et al. 2015). It is therefore  
48 crucial to predict the number of future extinctions that shape the future biodiversity, whether  
49 in terms of species, phylogenetic, or functional diversity (Davis et al. 2018, Cooke et al.  
50 2019, Pimiento et al. 2020). An important use of such predictions is to aid conservation  
51 prioritization (Mooers et al. 2008). However, all predictions require reliable estimates of  
52 extinction risk.

53 The main global initiative to quantify extinction risks across animal and plant species is the  
54 IUCN Red List (IUCN Red List 2019), which categorizes the conservation status of  
55 organisms based on expert assessments. Since 2001, the IUCN has adopted the IUCN v3.1  
56 evaluation system for determining species' conservation statuses (IUCN Species Survival  
57 Commission 2001). By this standard, extant species are assessed as Least Concern (LC),  
58 Near Threatened (NT), Vulnerable (VU), Endangered (EN), or Critically Endangered (CR). If  
59 there is insufficient information available for a species to enable a proper status assessment,  
60 the species is categorized as Data Deficient (DD). Species that have not yet been reviewed by  
61 the IUCN are categorized as Non-Evaluated (NE). Species that are not found in the wild  
62 anymore are labeled as Extinct in the Wild (EW), and species with no living wild or captive  
63 individuals as Extinct (EX). As of the year 2020, IUCN has also introduced two additional  
64 subcategories for CR species (IUCN 2020): possibly extinct [CR(PE)], and possibly extinct  
65 in the wild [CR(PEW)].

66 For the IUCN to decide on assigning a species to one of the threatened categories VU, EN, or  
67 CR, this species must meet at least one of five assessment criteria (A-E). One of those criteria

68 (E) is associated with a specific extinction probability, while the other criteria (A-D) mostly  
69 encompass estimates of decreasing population trends and fragmentation. The IUCN  
70 extinction probability thresholds defined in criterion E are as follows:

- 71 • VU: 10% extinction probability within 100 years
- 72 • EN: 20% extinction probability within 20 years or 5 generations, whichever is longer  
73 (maximum 100 years)
- 74 • CR: 50% extinction probability within 10 years or 3 generations, whichever is longer  
75 (maximum 100 years)

76 IUCN conservation status assessments have been used in numerous scientific studies to  
77 project future biodiversity loss (e.g. Ricciardi and Rasmussen 1999, Veron et al. 2016, Davis  
78 et al. 2018, Cooke et al. 2019, Oliveira et al. 2019). One critical challenge in this approach is  
79 to meaningfully transform the IUCN-defined conservation statuses into explicit extinction  
80 probabilities. In these previous studies, researchers have applied the extinction probabilities  
81 associated with criterion E to model extinction risks for threatened species. Sometimes these  
82 risks are also extrapolated to species of the statuses LC and NT in order to make it possible to  
83 assign extinction probabilities to these species (Redding and Mooers 2006, Mooers et al.  
84 2008, Veron et al. 2016, Davis et al. 2018).

85 Although these extinction probabilities only apply to species that are assessed under criterion  
86 E (see Akçakaya et al. 2006), they are commonly applied equally to all species sharing the  
87 same conservation status (e.g. Mooers et al. 2008, Davis et al. 2018). The underlying  
88 assumption that the minimum extinction risks defined for criterion E can be meaningfully  
89 transferred to species listed under one of the other four criteria (A-D) is difficult to test  
90 empirically, but is a necessary simplification in order to model the extinction probabilities for  
91 the majority of species. However, there are several other important aspects that can be easily

92 incorporated but are commonly neglected when translating IUCN conservation statuses into  
93 extinction probabilities for future extinction predictions.

#### 94 **Neglected information**

95 To the best of our knowledge, there are two key elements that are usually not incorporated  
96 when using IUCN status data for future extinction predictions: generation length and  
97 expected changes in conservation status (but see Monroe et al. 2019).

98 Generation length (GL) is defined as the average turnover rate of breeding individuals in a  
99 population (IUCN Standards and Petitions Committee 2019) and therefore reflects the  
100 turnover between generations. It is generally considered to be a more meaningful time unit  
101 for modeling extinction risk than time expressed in years (Frankham and Brook 2004).

102 Generation length should not be confused with age of sexual maturity, which can be used in  
103 the calculation of generation length, but is not equivalent (with age of sexual maturity always  
104 being smaller than or equal to generation length). As per the IUCN definition, the extinction  
105 probability for the categories EN and CR is to be understood in context of the GL of the  
106 given species, if  $5 \times GL$  exceeds 20 years for EN species, or if  $3 \times GL$  exceeds 10 years for  
107 CR species (see criterion E definitions above). We argue that including GL should be the  
108 standard practice when modeling extinction risks based on IUCN data, particularly because  
109 GL data is readily available for many species (Pacifci et al. 2013, BirdLife International  
110 2019, IUCN Red List 2019) and can normally be approximated through a combination of  
111 body size and phylogenetic information (Cooke et al. 2018, Bird et al. 2020) for species  
112 missing GL data (Appendix 1).

113 A second missing element in many future predictions relates to the fact that IUCN categories  
114 are generally treated as static entities that do not change over time. However, almost two

115 decades of IUCN re-assessments of species (IUCN Red List 2019), using the IUCN v3.1  
116 standard, have clearly shown this not to be the case. Instead, re-assessments (Butchart et al.  
117 2007, Rondinini et al. 2014) show that the conservation status of species can change  
118 significantly in a relatively short time span, for instance as a result of the effectiveness of  
119 conservation efforts. For a species classified as LC, the immediate extinction risk is  
120 negligibly small, while for a species classified as CR, the immediate extinction risk is very  
121 high. It is reasonable to assume that if we simulate, for example, 100 years into the future,  
122 categories may change due to new or intensified risks or thanks to conservation efforts, which  
123 will affect the extinction probabilities.

124 An example of a change in IUCN status is the Mauritian Pink Pigeon (*Nesoenas mayeri*),  
125 which was listed as CR in the 1990s, with only 9 birds remaining, due to habitat loss and  
126 predation by introduced species (Swinerton 2001, IUCN Red List 2019). However,  
127 following an intensive conservation recovery program, the Pink Pigeon is now listed as VU,  
128 with around 470 wild birds (IUCN Red List 2019). Unfortunately, most species show  
129 changes with the opposite trend, for example several species of vultures, which are declining  
130 due to poisoning and persecution (Green et al. 2007). There are 22 species of vulture  
131 (Accipitridae: Gypaetinae, Accipitridae: Aegypiinae, and Cathartidae) according to the IUCN  
132 Red List, 12 of these are classified as threatened (VU, EN or CR), including 9 CR species  
133 (IUCN Red List 2019), with sharp declines in population sizes. For instance, four species of  
134 vultures (the White-headed Vulture *Trigonoceps occipitalis*, White-backed Vulture *Gyps*  
135 *africanus*, Hooded Vulture *Necrosyrtes monachus* and Rüppell's Vulture *Gyps rueppelli*)  
136 were all listed as LC in 2004 but are now all classified as CR. Information about these  
137 changes can be accessed through the IUCN history record and can then be used to inform  
138 models of extinction risk.

139 While many previous studies have applied the IUCN-based extinction probabilities (criterion  
140 E) outlined above to model extinction risks, a recent study by Monroe et al. (2019) has  
141 presented an alternative approach, avoiding these probabilities altogether. Instead Monroe et  
142 al. (2019) modeled extinction risks based on observed transitions of species to the statuses  
143 EW or EX, which they then applied to model future biodiversity losses. While this approach  
144 avoids the above mentioned shortcomings of the IUCN extinction probability approach,  
145 namely the caveats surrounding the extrapolation of the criterion E specific extinction  
146 probabilities to species listed under other criteria (A-D), it is likely limited to groups of  
147 organisms with sufficient recorded transitions to EX in order to yield reliable extinction risk  
148 estimates.

149 In this study we contrast different variations of both approaches, to which we refer to  
150 hereafter as "critE EX mode" (approach based on IUCN criterion E extinction probabilities,  
151 sensu Mooers et al. 2008) and "empirical EX mode" (approach based on historic transitions  
152 towards statuses EW/EX, sensu Monroe et al. 2019). We add improvements to both  
153 approaches, including the incorporation of GL data for the critE EX mode and the  
154 consideration of possibly extinct taxa in the empirical EX mode. Further we present a novel  
155 MCMC-based approach of estimating status transition rates from historical IUCN data, and  
156 we apply these rates to simulate future status changes and extinctions. All approaches  
157 presented in this study are available in the new open-access simulation program *iucn\_sim*,  
158 which can be run via the bash command line and is tested for compatibility in Windows,  
159 MacOS, and Linux (Fig. 1, see Data availability statement).

## 160 **Material and methods**

161 Here we describe our approach of simulating future extinctions and IUCN status transitions  
162 on the example of birds (Aves). We use the terms "reference group" and "target species" as  
163 follows:

- 164 • **Reference group:** The group of species, whose IUCN history is being used to  
165 estimate status transition rates, i.e. the rates at which species change between IUCN  
166 statuses
- 167 • **Target species:** The group of species, for which future extinctions are being  
168 simulated, while applying the estimated status transition rates

169 In this study the reference group and target species list consist of the same taxa (all extant  
170 bird species), but this is not a requirement for this approach. For example, using our approach  
171 one could simulate future extinctions and status transitions for a specific bird family or local  
172 bird fauna, while using all birds as a larger reference group, in order to get reliable status  
173 transition rate estimates.

174 To make this approach accessible and easy to use for future projects, we wrapped the  
175 complete workflow described below into the open-source command line program *iucn\_sim*  
176 (Fig. 1, [https://github.com/tobiashofmann88/iucn\\_extinction\\_simulator](https://github.com/tobiashofmann88/iucn_extinction_simulator)), which can be easily  
177 installed together with all software dependencies using the conda package manager  
178 (<https://docs.conda.io>). Installation instructions are available on the projects GitHub page of  
179 this project. Using *iucn\_sim*, it is straight-forward to 1) model future changes in IUCN status,  
180 2) simulate possible times of extinction across species, and 3) estimate species-specific  
181 extinction rates for any given set of species over a user-defined time span. We executed all



182 steps outlined below using *iucn\_sim* (except the downloading of GL data) and we report the  
183 *iucn\_sim* command for each step in the Supplementary Code Sample 1.

#### 184 **Generation length estimates**

185 We downloaded GL estimates for all bird species from Bird et al. (2020), following the  
186 IUCN 2019-v2 taxonomy of extant bird species. Since the collecting of GL data can be  
187 challenging for some groups, we provide instructions how to generate GL data via  
188 phylogenetic imputation on the example of birds in Appendix 1 in the Supplementary  
189 Material. See Cooke et al. (2018) and Bird et al. (2020) for more detailed instructions and  
190 information on generating GL estimates for species.

#### 191 **Downloading IUCN data**

192 We downloaded the complete IUCN history for the reference group (class Aves) from the  
193 year 2001 onward, to ensure compatibility with the IUCN v3.1 standard (IUCN Species  
194 Survival Commission 2001), using the *rl\_history* function of the R-package rredlist  
195 (Chamberlain 2017) and IUCN v2019-2. The taxon list for this download was generated by  
196 scanning through the entire IUCN Red List catalogue for species assigned to the class Aves,  
197 using the *rl\_sp* function. In addition to the historic data, we extracted the current status (most  
198 recent status assessment) of all target species (all Aves species) using the *rl\_search* function.  
199 For all following operations we set the status of all EW species to EX.

#### 200 **Status transition rates**

201 Based on the IUCN history data, we counted all types of status changes that have occurred in  
202 the IUCN history of birds (Table 1), as well as the cumulative amount of time spent in each  
203 status across all bird species. For instance, if a given species was classified as NT from 2001

204 to 2005 and then EN from 2005 to today (2020), this species contributes 1 status change from  
205 NT to EN and 4 years in NT and 16 years in EN.

206 From these counts we estimated the rates of transitions between all pairs of statuses using  
207 Bayesian sampling. For example, if  $N_{ij}$  transitions were observed from status  $i$  to status  $j$  and  
208 the cumulative time spent in  $i$  across all species in the reference group is  $t_i$ , we used a  
209 Markov chain Monte Carlo (MCMC) algorithm to sample the annual transition rate  $q_{ij}$  from  
210 the following posterior:

$$P(q_{ij}|N_{ij}, t_i) \propto P(N_{ij}, t_i|q_{ij}) \times P(q_{ij}) \quad \text{Eq. 1}$$

211 where the log likelihood function is that of a Poisson process describing status change

$$\log P(N_{ij}, t_i|q_{ij}) \propto N_{ij} \log(q_{ij}) - q_{ij} t_i \quad \text{Eq. 2}$$

212 and  $P(q_{ij}) \sim \mathcal{U}[0,1000]$  is a vague uniform prior on the transition rate.

213 To incorporate the uncertainties in the transition rate estimates, we took 100 samples from the  
214 posterior distribution of the rate estimates (Eq. 1) for each transition type (Table 2). More  
215 specifically we populated 100 q-matrices containing the sampled rates for each type of status  
216 transition. These q-matrices were used for future simulations, allowing us to simulate  
217 potential future status changes of any species, given its starting status (see more detailed  
218 explanation below). In addition, we sampled 100 transition rates for all transition types from  
219 DD to any of the statuses LC, NT, VU, EN, and CR, which we used during the future  
220 simulations to draw a new valid status for DD species.

221 Finally, we modelled the transition rates towards extinction (EX) from any extant status  $i$   
 222 ( $q_{i \rightarrow EX}$ ). Modelling these transition rates towards EX is non-trivial and we used two  
 223 approaches to estimate these rates, which we refer to as the critE EX mode and the empirical  
 224 EX mode. The critE EX mode is based on the IUCN criterion E extinction probabilities  
 225 defined for threatened statuses (sensu Mooers et al. 2008), whereas the empirical EX mode is  
 226 based on empirically observed transitions towards EW/EX in the IUCN history (sensu  
 227 Monroe et al. 2019).

228 The final q-matrices contain all status transition rates, including the rates towards extinction  
 229 for each given status, determined with either the critE EX mode or the empirical EX mode  
 230 outlined below (last column). Since in our simulations, species are not allowed to reappear  
 231 after extinction, we set the rates from EX to any other status equal to 0:

$$\begin{pmatrix} & \mathbf{LC} & \mathbf{NT} & \mathbf{VU} & \mathbf{EN} & \mathbf{CR} & \mathbf{EX} \\ \mathbf{LC} & - & q_{LC \rightarrow NT} & q_{LC \rightarrow VU} & q_{LC \rightarrow EN} & q_{LC \rightarrow CR} & q_{LC \rightarrow EX} \\ \mathbf{NT} & q_{NT \rightarrow LC} & - & q_{NT \rightarrow VU} & q_{NT \rightarrow EN} & q_{NT \rightarrow CR} & q_{NT \rightarrow EX} \\ \mathbf{VU} & q_{VU \rightarrow LC} & q_{VU \rightarrow NT} & - & q_{VU \rightarrow EN} & q_{VU \rightarrow CR} & q_{VU \rightarrow EX} \\ \mathbf{EN} & q_{EN \rightarrow LC} & q_{EN \rightarrow NT} & q_{EN \rightarrow VU} & - & q_{EN \rightarrow CR} & q_{EN \rightarrow EX} (GL) \\ \mathbf{CR} & q_{CR \rightarrow LC} & q_{CR \rightarrow NT} & q_{CR \rightarrow VU} & q_{CR \rightarrow EN} & - & q_{CR \rightarrow EX} (GL) \\ \mathbf{EX} & 0 & 0 & 0 & 0 & 0 & - \end{pmatrix} \quad \text{Eq. 3}$$

### 232 1) CritE EX mode

233 In the critE EX mode approach (*iucn\_sim* setting: `--extinction_probs_mode 0`) we  
 234 transformed the extinction probabilities ( $E_t$ ) associated with threatened IUCN statuses (see  
 235 Introduction), defined over specific time frames ( $t$ ), into annual status-specific EX transition  
 236 rates ( $q_{i \rightarrow EX}$ ), using the formula provided by (Kindvall and Gärdenfors 2003):

$$q_{i \rightarrow EX} = 1 - \sqrt[t]{1 - E_t} \quad \text{Eq. 4}$$

237 Since the IUCN extinction probabilities are only defined for the statuses VU, EN, and CR,  
238 we extrapolated the annual EX transition rates for the remaining statuses LC and NT by  
239 fitting a power function to the calculated extinction rates for the statuses VU, EN, and CR,  
240 estimating the parameters  $a$  and  $b$  (Appendix 1):

$$241 \quad q_{i \rightarrow EX} = ax^b$$

242 where  $x$  represents the index of the IUCN category, sorted by increasing threat (i.e.  $x_{LC} =$   
243  $1, x_{NT} = 2, \dots, x_{CR} = 5$ ). After estimating the parameters  $a$  and  $b$ , we calculated the annual  
244 transition rates to EX for statuses LC and NT, using the above power function.

245 According to the IUCN definition, the extinction probabilities linked to the IUCN categories  
246 EN and CR for individual species are dependent on the GL of these species. In order to  
247 properly model the EX transition rates for these statuses on a species-specific basis, we  
248 applied GL data to adjust the time frame ( $t$ ) associated with the extinction probabilities. For  
249 example for a species with a GL of 5 years, which is categorized as CR (IUCN definition:  
250 "50% extinction probability within 10 years or 3 generations, whichever is longer"), the  
251 annual EX transition rate according to Eq. 4 is  $q_{CR \rightarrow EX} = 1 - \sqrt[3*GL]{1 - 0.5} = 0.045$ , whereas  
252 for a species with a GL of 2 years with status CR the EX transition rate is  $q_{CR \rightarrow EX} = 1 -$   
253  $\sqrt[10]{1 - 0.5} = 0.067$ , because in the latter case  $3 * GL < 10 \text{ years}$ . From this follows that  
254 when ignoring GL information and setting  $t = 10$  for all species (e.g. Mooers et al. 2008),  
255 the extinction risk for species with moderate or long generation times ( $>3.33$  years) will be  
256 overestimated (Fig 2).

257 We therefore applied the GL estimates of all individual bird species (Bird et al. 2020) for the  
258 calculation of the yearly EX transition rates for the statuses EN and CR of each species. We  
259 then added these GL-adjusted EX transition rates to the q-matrices containing the extant

260 status transition rates (Eq. 3) to simulate future status changes and extinctions. Although the  
261 EX transition rates derived in this manner and the extant status transition rates are modelled  
262 based on two different data sources, they can be combined in the same q-matrix since all of  
263 these rates are expressed in the same unit (transition events per species and year). To evaluate  
264 how the presence of GL data affects future extinction predictions, we produced an additional  
265 set of q-matrices where we did not apply GL data ("no GL" scenario). Further, to evaluate the  
266 effect of modeling future status changes, we produced additional sets of q-matrices where all  
267 transition rates between extant statuses were set to 0 ("no status change" scenarios), for both  
268 the GL and no GL scenario.

## 269 2) Empirical EX mode

270 In the empirical EX mode approach (*iucn\_sim* setting: `--extinction_probs_mode 1`) we  
271 estimated EX transition rates based on the observed transitions from any given extant status  
272 to EX in the IUCN history of birds, *sensu* Monroe et al. (2019). Following the same  
273 procedure we used to infer transition rates between other statuses, we counted the transitions  
274 from any status to EX (Table 1) and used MCMC to sample from the posterior transition rate  
275 distribution (Eq. 1), of which we randomly selected 100 samples for each type of transition.  
276 In contrast to the approach of Monroe et al. (2019), we estimated a specific transition rate  
277 from any given status to EX using our MCMC based approach, instead of only allowing  
278 transitions from CR to EW/EX. However, due to no observed occurrences of transitions of  
279 the statuses LC, NT, VU, and EN to EX in the IUCN history of birds, the estimated rates for  
280 these types of transitions are negligible, effectively making these transitions events very  
281 unlikely in our simulations of future extinctions. A further difference is that we did not  
282 distinguish between the statuses EW and EX, but instead treated both statuses as extinct. We  
283 inserted the 100 sampled rates into the last column of the q-matrix (Table 2). Since no GL

284 data replicates or other species-specific data were used in this approach, the same 100 q-  
285 matrices were applied to all species for future simulations.

286 The empirical EX mode approach is likely to underestimate the true transition rate, as for  
287 several threatened species there is insufficient evidence to categorize them as EX, although  
288 they are likely to be extinct (IUCN 2020). In order to better account for this underestimation  
289 bias, we generated another set of q-matrices, where we incorporated information on possibly  
290 extinct species [CR(PE) *sensu* IUCN 2020]. Prior to determining the numbers of transitions,  
291 we modeled these species as EX, starting from the date that they were categorized as PEX  
292 (the empirical EX mode + PEX approach). This modeling of PEX species was only done for  
293 the purpose of estimating EX transition rates, while these species were classified as CR as a  
294 departure point for future simulations (see below).

### 295 **Simulating future extinctions**

296 We used the transition rates from the estimated q-matrices (Eq. 3) to simulate for all bird  
297 species future transitions between extant statuses or to toward EX. Before simulating into the  
298 future, each species was assigned its current IUCN status as starting status. For all species  
299 currently assigned as DD, we randomly drew a new status based on a probability vector  
300 consisting of the estimated transition rates leading from DD to the valid statuses LC, NT,  
301 VU, EN, or CR. For all NE species we drew a new valid IUCN status based on the  
302 frequencies of valid IUCN statuses across all bird species. We treated species that are  
303 categorized as EW or EX by IUCN as irrevocably extinct and therefore did not include these  
304 species in future simulations.

305 We modeled transitions as a Poisson process, by generating time-forward simulations for  
306 each species based on exponentially distributed waiting times between transition events. For  
307 a given current status  $i$  the waiting time until the next event is

308 
$$\Delta t \sim \text{Exp} \left( \sum_{j \in S \setminus i} q_{ij} \right)$$

309 where  $S \setminus i$  is the set of statuses excluding the current status  $i$ . The type of transition after the  
310 waiting time  $\Delta t$  is then sampled randomly with probabilities proportional to the rates in  $S \setminus i$ .

311 We repeated these time-forward simulations for each species up to a pre-defined time of  
312  $t_{max} = 100$  years after present, producing 10,000 simulations for all 6 approaches outlined  
313 above: i) critE EX mode, ii) critE EX mode no GL, iii) critE EX mode no status change, iv)  
314 critE EX mode no GL and no status change, v) empirical EX mode, vi) empirical EX mode +  
315 PEX. For each simulation replicate, we repeated the drawing of a valid IUCN status for DD  
316 and NE species, thus incorporating this uncertainty in the simulations.

317 From the simulation output we extracted for each species a) the extinction times  $t_{\{EX\}}$  for  
318 those simulation replicates where  $t_{EX} < t_{max}$  or b) the waiting times of length  $t_{max}$  for those  
319 simulation replicates where the species did not go extinct within the specified time window.

320 Next we used these extinction times and waiting times to estimate species-specific annual  
321 extinction rates averaged across the simulated time window.

322 For a given set of extinction times and waiting times simulated for species  $i$ , we applied a  
323 MCMC to obtain posterior samples of the extinction rate  $\mu_i$  using the likelihood function of a  
324 death process (Silvestro et al. 2019):

$$P(w|\mu_i) \propto \mu_i^D \times \exp(-\mu_i \sum_{j \in w} (w_j)) \quad \text{Eq. 5}$$

325 where  $D$  is the number of instances in which  $w \leq t_{max}$ , i.e. the number of simulation  
326 replicates in which the species went extinct within the considered time window.

327 We sampled estimates of  $\mu_i$  for each species throughout the MCMC from the posterior  
328 distribution:

$$P(\mu_i|w) \propto P(w|\mu_i) \times P(\mu_i) \quad \text{Eq. 6}$$

329 where  $P(\mu_i)$  is a uniform prior distribution ( $\mathcal{U}[0,1000]$ ) set on the extinction rate. For each  
330 bird species we exported the mean and the 95% HPD interval of the posterior extinction rate  
331 estimates.

332 To compare the extinction rates between different approaches, we calculated the average  
333 extinction rate for each approach by running an MCMC with the death process likelihood  
334 function (Eq. 5), based on the simulated extinction dates of all bird species across 10,000  
335 simulation replicates.

### 336 **Testing accuracy with synthetic data**

337 In addition to the empirical bird data, we validated our approach on simulated data to  
338 determine the accuracy of the estimated transition rates and extinction rates.

339 To test the accuracy of the transition rates estimated from the IUCN history and the effect of  
340 the size of the chosen reference group on these estimates, we simulated status transitions data  
341 mimicking the empirical IUCN history data. We then simulated status changes over a time  
342 period of 20 years for reference groups of 100, 1,000, and 10,000 species. The starting status



343 for each species was drawn randomly, based on the empirical frequencies of the current  
344 IUCN status distribution across all birds. To produce realistic transition rates to use for our  
345 simulations, we randomly drew these rates from a uniform range in log-space, ranging  
346 between the minimum and the maximum empirical rate estimated for birds. We drew 30 rates  
347 to reflect the 30 possible transition types between the six main IUCN statuses (LC, NT, VU,  
348 EN, CR, and DD). We then simulated the change of IUCN statuses through time in the same  
349 manner as described above for the future simulations for the empirical bird data, with the  
350 difference that no extinction events were being modeled. We then used the simulated IUCN  
351 history for all species to infer transition rates using MCMC as done for the empirical bird  
352 data.

353 To evaluate the accuracy of the species-specific extinction rates estimated with our approach,  
354 we simulated extinction times for 1,000 species under known extinction rates. The extinction  
355 rates ( $\mu$ ) that were used for these simulations were randomly drawn from a uniform range (in  
356 log-space) with a minimum and maximum value derived from the EX transition rates of the  
357 statuses LC and CR respectively, as modeled in this study with the outlined IUCN extinction  
358 probabilities approach. Based on the chosen number of simulation replicates,  $N$  extinction  
359 time replicates ( $t_e$ ) were drawn randomly from an exponential distribution with mean  $\mu^{-1}$  for  
360 each species. This simulation was repeated for 100, 1,000, and 10,000 replicates, in order to  
361 test how many replicates are necessary for an accurate rate estimation.

## 362 **Results**

### 363 **Transition rates**

364 We counted a total of 919 status transitions between extant IUCN statuses in the IUCN  
365 history data of birds between the years 2001 and 2020 (Table 1). Additionally, we counted 6

366 transitions from CR to EX. This count increased to 20 when additionally modeling the PEX  
367 taxa as EX. The mean transition rates estimated from these counts, averaged across all 100 q-  
368 matrix replicates for all species, can be found in Table 2. With our transition rate estimation  
369 method, even transition types with zero-counts in the IUCN history are assigned a positive  
370 transition rate, although these rates will be very small. Differences between estimated rates  
371 can occur even if based on identical counts because of differences in the cumulative times  
372 spent in each category (see Eq. 2), as can be seen when for example comparing the transition  
373 rate from LC to EX with that from EN to EX, which differ by orders of magnitude (Table 2).  
374 A comparison between the estimated EX transition rates based on the two main approaches  
375 tested in this study (critE EX mode and empirical EX mode) show, that the empirical EX  
376 mode, which uses empirical extinction events, leads to lower average transition rates towards  
377 status EX for the threatened categories (Table 2).

378 The estimates based on our synthetic status transition data demonstrate that our approach  
379 accurately recovers the transition rates that were used to simulate the data, yet the precision  
380 of these estimates is strongly dependent on the size of the reference group (Fig. 3a). These  
381 results suggest that it is recommendable to choose reference groups of preferably more than  
382 1,000 species, because stochastic fluctuations of status counts below that threshold preclude  
383 the estimation of transition rates with meaningful precision, particularly so for low rates.

#### 384 **Future extinctions**

385 Our future simulations for birds based on the critE EX mode approach resulted in 738  
386 predicted species extinction within the next 100 years (95% confidence interval: 669-809  
387 species, Fig. 2). In comparison the empirical EX mode approach resulted in 57 predicted  
388 extinctions within the same time frame (21-93), which increased to 127 (82-182) when

389 accounting for PEX species. The species-specific extinction rates for all birds are available in  
390 the Supplementary Data.

391 The estimations of species-specific extinction rates from the simulated extinction times (Eq.  
392 5) produces accurate rate estimates, yet it requires around 10,000 future simulation replicates  
393 to ensure this accuracy also for very low rates, such as species starting as LC (Fig. 3b). These  
394 species-specific rates differ significantly between the approaches tested in this study (Fig. 4).  
395 The empirical EX mode consistently leads to lower rate estimates than the critE EX mode,  
396 which is a direct result of the differences in EX transition rates in the q-matrix between these  
397 two approaches (Table 2).

398 The average rate estimated across all birds for the critE EX mode was  $6.98 \times 10^{-4}$   
399 extinctions per species-years (ESY) (95% credible interval  $6.97 - 6.98 \times 10^{-4}$ ). This rate is  
400 to be understood as the average bird extinction rate expected over the next 100 years. The  
401 rate for the empirical EX mode was estimated to be significantly lower at  $5.09 \times 10^{-5}$   
402 ( $5.08 - 5.11 \times 10^{-5}$ ). When in addition modeling PEX taxa as extinct, the rate increased to  
403  $1.16 \times 10^{-4}$  E/SY ( $1.15 - 1.16 \times 10^{-4}$ ). These rate estimates fall within the same level of  
404 magnitude as previous estimates for birds, such as the  $2.17 \times 10^{-4}$  E/SY estimated by  
405 Monroe et al. (2019).

406 To further compare our results with those of Monroe et al. (2019), we additionally simulated  
407 extinctions and estimated extinction rates within a time window of 500 years, to match the  
408 time window addressed in their study, and we used the empirical EX mode setting to match  
409 the approach taken in their study. This resulted in an average rate estimate of  $1.37 \times 10^{-4}$   
410 E/SY ( $1.369 - 1.370 \times 10^{-4}$ ) for the empirical EX mode approach, which represents the  
411 average rate expected for the next 500 years under this model. These rate estimates are  
412 significantly lower than the  $2.17 \times 10^{-4}$  E/SY estimated by Monroe et al. (2019). Yet, the

413 predicted number of extinctions under our approach ranged between 271 and 791, which  
414 largely overlaps with the 226 to 589 extinctions predicted by Monroe et al. (2019).

415 This discrepancy in rate estimates reflects a difference in how the rates are estimated and  
416 what they represent. Monroe et al. (2019) calculated their rate as the inverse of the average  
417 expected longevity (time until extinction) based on all birds. This corresponds to the average  
418 extinction rate of a process running until the extinction of all species. Our rate estimate, on  
419 the other hand, is based on simulated extinction events over the next 500 years and therefore  
420 reflects the average extinction rate within that time frame. Because in both approaches  
421 species threat statuses evolve according to an asymmetric transition matrix (Eq. 3, Table 2),  
422 the extinction process is not time-homogenous, as also noted by Monroe et al. (2019).

423 Extinction rates increase through time as a consequence of the trend towards increasing  
424 frequencies of high threat statuses (Fig. 2). Consequently, rates averaged over a shorter time  
425 window (as the 500 years simulated in our case) are expected to be lower than rates averaged  
426 over the much longer time window reaching until the time of the expected extinction of all  
427 birds (Monroe et al. 2019).

428 Our rate estimates provide a representation of the extinction process specifically within the  
429 time window of interest and they change accordingly to the chosen simulation time. This is  
430 the reason why the rate estimates for the empirical EX mode approach, reported above, differ  
431 between the 100 year and the 500 years simulations ( $5.09 \times 10^{-5}$ , and  $1.37 \times 10^{-4}$   
432 respectively).

433 To better compare the estimated rates between Monroe et al. (2019) and our study, we  
434 calculated the expected number of extinctions under each rate for the time interval of 500  
435 years. Using the properties of a death process and assuming time-homogeneous rates within

436 this interval we can compute the expected number of extinctions (D) based on a number  $N$  of  
437 initial species within a time interval  $t$  as:

$$438 \quad D = N \times (1 - \exp(-\mu t))$$

439 where the second term of the multiplication is the probability of surviving until time  $t$  given  
440 the extinction rate  $\mu$ . Using this formula with  $N = 10,961$  (number of extant bird species  
441 according to IUCN 2019-v2) and  $t = 500$  years with our extinction rate ( $\mu = 1.37 \times 10^{-4}$ )  
442 we obtain 726 expected number of extinctions, which is well within the range obtained from  
443 our simulations (271 - 791). In contrast, the  $2.17 \times 10^{-4}$  rate of Monroe et al. (2019) predicts  
444 1,127 extinctions for the same time frame. This differs from their reported range of 226 to  
445 589 expected extinctions, which was not estimated based on that reported rate, but derived  
446 from the expected longevities of all species based on an IUCN status transition q-matrix,  
447 similar to the one used in our study. Their rate estimate was calculated subsequently as the  
448 inverse of the average longevity across all birds and thus represents an overall rate averaged  
449 across the complete time frame until the extinction of all birds. Our rate estimate on the other  
450 hand is specific to the chosen simulation time window and describes more adequately the  
451 extinction process within that window. This demonstrates the utility of our **iucn\_sim**  
452 program, which can be applied in future studies to predict extinction rates for specified time  
453 frames for any organism group or for individual species.

#### 454 **Effect of modeling status change and GL data**

455 Our empirical results show that accounting for GL data decreases the resulting extinction rate  
456 estimates (Fig. 5). As an example we highlight this effect for the Red-headed Vulture  
457 (*Sarcogyps calvus*), which is categorized as CR and has a relatively long generation length of  
458 15 years (IUCN Red List 2019). The reduction of extinction probability when including GL

459 is expected to be particularly strong for CR species with long GL times, since the immediate  
460 extinction probability applied in the simulations for EN and CR species decreases when  
461 incorporating the GL information, according to IUCN definition (critE EX mode). But the  
462 GL effect will also apply to LC species, as highlighted for the Turkey Vulture (*Cathartes*  
463 *aura*, GL = 9.9 years), where incorporating GL data leads to a small decrease in the  
464 extinction rate estimates, since occasionally these species will transition to the categories EN  
465 or CR in the future simulations, when allowing for future status changes (Fig. 5a). Overall,  
466 accounting for GL data leads to a decrease in the number of predicted extinctions across the  
467 whole target group (Fig. 6).

468 The effect of modeling future IUCN status changes can increase or decrease the estimated  
469 extinction rates of a species, depending on its current status and on the transition rates  
470 between statuses. Therefore, this effect is expected to be dependent on the chosen reference  
471 group. However, for LC species this generally appears to lead to an increase in the estimated  
472 extinction rates (Fig. 5c), which is likely because these species can only change to a more  
473 threatened status (LC being the least threatened status). Similarly, for CR species, the effect  
474 of modeling future status changes generally leads to a decrease in extinction rates (Fig. 5d),  
475 since species can only switch to less threatened categories in the future (CR being the most  
476 threatened status). Overall, modeling future status changes leads to a sharp increase in the  
477 number of predicted extinctions across the whole target group (Fig. 6), compared to the  
478 scenario with no future status changes.

## 479 **Discussion**

### 480 **Utility of the *iucn\_sim* program**

481 With our open-source program *iucn\_sim* that accompanies this study, we are presenting  
482 improved versions of the two main approaches of previous studies for modeling future  
483 biodiversity losses based on IUCN status assessments (Fig. 1). Through this, we hope to  
484 facilitate future studies to apply these workflows for generating future diversity predictions  
485 and for estimating extinction rates for whole groups or individual species. The program is  
486 easy to use and to simulate future extinctions it requires only a list of target species names, or  
487 even just the name of the taxonomic group, as it automatically retrieves all available IUCN  
488 information. Moreover, *iucn\_sim* also allows for additional data input for more specific  
489 estimates, such as GL data, that the user can choose to provide.

490 One of the main outputs of the program is the predicted number of future species extinctions  
491 for a given group of species, as well as the future changes of the IUCN status distribution  
492 within the group (Fig. 2). The program also calculates the probabilities of each species being  
493 extinct by a user-defined date. Finally, the program estimates the extinction rates based on  
494 the simulated extinction dates separately for each species (Fig. 4). These species-specific  
495 extinction rates can be of interest for downstream analyses where species are required to be  
496 modeled individually based on biological or geographic data, and where the extinction  
497 dynamics of specific species or groupings of species are of interest (Davis et al. 2018, Cooke  
498 et al. 2019, Pimiento et al. 2020).

499 We note that the actual extinction rates of a given species or group are expected to vary over  
500 time as a function of changes in the IUCN status, while the extinction rates inferred by  
501 *iucn\_sim* are a time-averaged proxy of this process. Particularly during the current human-

502 induced wave of extinctions, extinction rates are expected to vary within relatively short time  
503 frames of at least 100s of years (Ceballos et al. 2015). Therefore, our approach presented here  
504 may not be suitable for estimating extinction rates based on simulations that span across  
505 several hundred years or more.

506 Our method further allows for modeling DD species for which IUCN statuses are imputed  
507 based on historical transition rates that reflect how frequently DD species change to other  
508 statuses. Similarly, a new status for NE species is modeled based on the current status  
509 distribution of the reference group. As a status is imputed for DD and NE species at each  
510 simulation replicate, our method incorporates the full uncertainty concerning their true status.  
511 The *iucn\_sim* program flags and prints to the screen the names of those species that cannot  
512 be found in the IUCN taxonomy and produces a warning for the user to revise the taxonomy.  
513 If these cases cannot be fixed by the user, they will be treated as NE. This approach enables  
514 future simulations even for groups where it is difficult to match the taxonomy with that of  
515 IUCN, yet we recommend thoroughly revising the taxonomies to minimize the number of  
516 taxonomic mismatches. Never the less, species unknown to IUCN, which are modeled in this  
517 manner, are not expected to bias the overall future biodiversity predictions (under the  
518 assumption that these taxa constitute a random sample of the target species group), due to  
519 their status being repeatedly resampled based on the empirical status distribution of the  
520 reference group. While these species are not expected to affect the overall predictions for the  
521 target group, the resulting species-specific extinction rates for these taxa on the other hand  
522 may be misrepresentative. To address this issue, the user can manually change the status of  
523 NE species to a status they deem more representative for the species, by altering the status in  
524 the *species\_data.txt* text file produced by *iucn\_sim*.



525 Our *iucn\_sim* program further allows the simulation of different future conservation  
526 scenarios, through simple q-matrix modifications. For example, one can simulate an increase  
527 of conservation efforts by providing a specific conservation factor. This factor is then applied  
528 to all transition rates in the q-matrix, leading to an improvement in conservation status for  
529 each species. Similarly, one can simulate increased threats by providing a threat factor, which  
530 is then applied to all threat-increasing transition rates in the q-matrix. These factors can also  
531 be set to 0 to simulate scenarios that do not allow for future improvements or increased  
532 threats. This flexibility of *iucn\_sim* makes it easy to simulate and compare different future  
533 scenarios and their expected effect on biodiversity.

#### 534 **Comparing approaches to simulate future extinctions**

535 The critE EX mode and empirical EX mode approaches that were applied in this study  
536 represent different ways of modeling the EX transition rates, which are the rates at which  
537 species transition towards extinction in our future simulations. These are not to be confused  
538 with the species-specific extinction rates, which are instead estimated from the simulated  
539 extinction times and describe the extinction risk of individual species.

540 The critE EX mode makes use of extinction probabilities that are defined by the IUCN as one  
541 of several criteria for species assessments of threatened species. Although widely used in the  
542 scientific literature for modeling species' extinction risks (Veron et al. 2016, Davis et al.  
543 2018, Cooke et al. 2019, Oliveira et al. 2019), these probabilities are not originally intended  
544 for this purpose and per definition only apply to the subset of threatened species that was  
545 assessed under criterion E (Akçakaya et al. 2006). The simulated extinctions resulting from  
546 this approach are alarmingly high and the estimated extinction rates are in most cases more  
547 than an order of magnitude higher than those estimated with the empirical EX mode  
548 approach, even when accounting for PEX taxa in the latter approach.

549 The empirical EX mode, on the other hand, will likely lead to an underestimation of the true  
550 extinction rates, because it is directly dependent on the number of observed transitions from  
551 extant categories to EW or EX in the IUCN history, and these documented numbers are likely  
552 a significant underestimate (IUCN 2020). This underestimation bias is due to rather strict  
553 requirements to classify species as EW or EX. In 2020, IUCN therefore released a list of  
554 species that are possibly extinct (PEX species), but do not qualify as EX according to the  
555 IUCN guidelines. Making use of this information (which is available in *iucn\_sim*) and  
556 modeling these taxa as extinct, usually leads to more observed status transitions towards EX  
557 within the last 20 years of IUCN history and therefore leads to higher EX transition rate  
558 estimates that are expected to better reflect the true extinction risk within the studied group.  
559 However, this approach is expected to be sensitive towards small reference groups with very  
560 few or no observed extinctions, which will lead to high uncertainties in the estimated rates.  
561 Given these significant differences in predicted future estimates between the two approaches,  
562 it is important to consider that these approaches are based on different assumptions and while  
563 both can theoretically be applied for any organism group, their utility varies depending on the  
564 group and purpose of the future simulations.

565 If the primary aim is to conservatively model future biodiversity losses for a given group of  
566 species, and if this group can be meaningfully represented by a reference group that is a) well  
567 represented in the IUCN Red List (i.e. many assessed species), b) has a high species  
568 diversity, and c) has several recorded extinctions throughout the last 20 years, then the  
569 empirical EX mode including PEX taxa may be the most suitable choice, as in this case EX  
570 transition rates can be meaningfully modeled for the specific reference group, rather than  
571 being based on general pre-defined extinction probabilities.

572 If, on the other hand, the primary aim is to produce species-specific extinction rates for  
573 downstream analyses, and GL data is available or can be modeled for the group of species,  
574 then the critE EX mode approach may be the more appropriate choice, as it leads to a larger  
575 variation of rate estimates. This variation is expected to reflect differences in how threatened  
576 with extinction species of the same category are, based on their differences in GL. In the  
577 empirical EX mode approach on the other hand all species belonging to a given category are  
578 modeled equally, only leading to small stochastic differences between the rates of species  
579 belonging to the same status.

### 580 **Choice of reference group**

581 Essential to both approaches discussed above is the choice of the reference group, because  
582 the precision and accuracy of the estimated transition rates depends on the number of species  
583 in the reference group (Fig. 3). There are two main considerations to make when choosing a  
584 reference group: 1) Is the chosen group expected to reflect the trends of status change for the  
585 target species that are being simulated? and 2) Does the reference group contain a sufficient  
586 number of species so that stochastic effects do not overrule the actual trends for that group?

587 These two objectives can conflict, as illustrated by the example of simulating future  
588 extinctions for vultures. In that case, using all birds (class Aves) as reference group (~ 11,000  
589 species) provides a large enough group of sufficient size for accurate transition rate  
590 estimations. However, given the notable recent worsening of almost all vulture species'  
591 conservation status (e.g. Green et al. 2007), the trends observed over all birds may not be  
592 representative of this group.

593 The species in the reference group do not necessarily have to form a monophyletic clade,  
594 although phylogenetically related taxa are likely to provide a suitable reference group if there

595 is any phylogenetic signal in extinction risk. More importantly, a suitable reference group  
596 consists of species that are expected to share the same extinction threats as the group of target  
597 species for which to simulate future extinctions, so that representative status transition rates  
598 can be inferred. A reference group could include species that share a similar ecology and are  
599 similarly affected by habitat losses or pollution, or it could include species from the same  
600 biogeographic area as the target species if they are expected to share common threats, such as  
601 is the case for many island faunas. For these reasons, the reference group should also always  
602 contain all of the target species, although this is not an analytical requirement.

## 603 **Conclusions**

604 In this study, we demonstrated that modeling future changes in IUCN conservation status and  
605 incorporating generation length data has a substantial effect on future extinction predictions.  
606 In addition, we encountered significant differences in extinction rate predictions when  
607 comparing different approaches of modeling extinction risks. This shows that the results of  
608 future projections are strongly dependent on the selected method and the selected reference  
609 group.

610 The aim of this study was to make the simulation of future extinctions under different  
611 approaches accessible for future projects. Further, this study can provide a starting point for  
612 researchers to decide which approach to choose for their specific target group and research  
613 objective.

614 Our software *iucn\_sim* is designed for ease of use and contains many options for adjusting  
615 the simulation approach for different types of projects. The source code on GitHub is open  
616 for contributions and feedback from users, which hopefully will lead to the incorporation of  
617 further improvements for predicting future extinctions. Future additions to the program could

618 for example include more specific future modeling of species based on similarities in  
619 biological traits, geographic location, or niche space.

## 620 **Data availability statement**

621 All source code, input files used in this study, and the output produced by *iucn\_sim* are  
622 available on the project's GitHub repository at  
623 [https://github.com/tobiashofmann88/iucn\\_extinction\\_simulator](https://github.com/tobiashofmann88/iucn_extinction_simulator). The estimated extinction  
624 rates for all bird species, a Supplementary Code Sample describing the *iucn\_sim* workflow,  
625 and Appendix 1, can be directly downloaded from the Supplementary Material  
626 accompanying this study.

## 627 **References**

- 628 Akçakaya, H. R. et al. 2006. Use and misuse of the IUCN Red List Criteria in projecting  
629 climate change impacts on biodiversity. - *Global Change Biology* 12: 2037–2043.
- 630 Barnosky, A. D. et al. 2011. Has the Earth's sixth mass extinction already arrived? - *Nature*  
631 471: 51–57.
- 632 Bird, J. P. et al. 2020. Generation lengths of the world's birds and their implications for  
633 extinction risk. - *Conservation Biology* in press.
- 634 BirdLife International 2019. BirdLife Data Zone. Available at  
635 <http://datazone.birdlife.org/home>.
- 636 Butchart, S. H. M. et al. 2007. Improvements to the Red List Index (D Lusseau, Ed.). - *PLoS*  
637 *ONE* 2: e140.
- 638 Ceballos, G. et al. 2015. Accelerated modern human – induced species losses: entering the  
639 sixth mass extinction. - *Science Advances* 1: 1–5.
- 640 Chamberlain, S. 2017. Rredlist: “IUCN” Red List Client.
- 641 Collar, N. et al. 2020. Kakapo (*Strigops habroptila*). - In: *Handbook of the Birds of the World*  
642 *Alive*. Lynx Edicions, Barcelona, in press.
- 643 Cooke, R. S. C. et al. 2018. Improving generation length estimates for the IUCN Red List (L  
644 Bosso, Ed.). - *PLOS ONE* 13: e0191770.

- 645 Cooke, R. S. C. et al. 2019. Projected losses of global mammal and bird ecological strategies.  
646 - Nature Communications 10: 2279.
- 647 Davis, M. et al. 2018. Mammal diversity will take millions of years to recover from the  
648 current biodiversity crisis. - Proceedings of the National Academy of Sciences of the  
649 United States of America 115: 11262–11267.
- 650 Díaz, S. et al. 2019. Summary for policymakers of the global assessment report on  
651 biodiversity and ecosystem services. - Intergovernmental Science-Policy Platform on  
652 Biodiversity and Ecosystem Services, IPBES.
- 653 Frankham, R. and Brook, B. W. 2004. The importance of time scale in conservation biology  
654 and ecology. - Annales Zoologici Fennici 41: 459–463.
- 655 Green, R. E. et al. 2007. Rate of Decline of the Oriental White-Backed Vulture Population in  
656 India Estimated from a Survey of Diclofenac Residues in Carcasses of Ungulates (D  
657 Carter, Ed.). - PLoS ONE 2: e686.
- 658 IUCN 2020. Summary Statistics - Table 9: Possibly Extinct species.
- 659 IUCN Red List 2019. Red List of threatened species v2019-2. Available at  
660 <http://www.iucnredlist.org>. - Version 2019-2
- 661 IUCN Species Survival Commission 2001. IUCN Red List Categories and Criteria: Version  
662 3.1. Available at [https://portals.iucn.org/library/sites/library/files/documents/RL-](https://portals.iucn.org/library/sites/library/files/documents/RL-2001-001.pdf)  
663 [2001-001.pdf](https://portals.iucn.org/library/sites/library/files/documents/RL-2001-001.pdf).
- 664 IUCN Standards and Petitions Committee 2019. Guidelines for Using the IUCN Red List  
665 Categories and Criteria. Version 14. Available at  
666 <http://www.iucnredlist.org/documents/RedListGuidelines.pdf>.
- 667 Kindvall, O. and Gärdenfors, U. 2003. Temporal Extrapolation of PVA Results in Relation to  
668 the IUCN Red List Criterion E. - Conservation Biology 17: 316–321.
- 669 Monroe, M. J. et al. 2019. The dynamics underlying avian extinction trajectories forecast a  
670 wave of extinctions. - Biology Letters 15: 20190633.
- 671 Mooers, A. Ø. et al. 2008. Converting endangered species categories to probabilities of  
672 extinction for phylogenetic conservation prioritization. - PLoS ONE 3: 1–5.
- 673 Oliveira, B. F. et al. 2019. Decoupled erosion of amphibians' phylogenetic and functional  
674 diversity due to extinction (A Ordonez, Ed.). - Global Ecology and Biogeography:  
675 geb.13031.
- 676 Pacifici, M. et al. 2013. Generation length for mammals. - Nature Conservation 5: 89–94.
- 677 Pimiento, C. et al. 2020. Functional diversity of marine megafauna in the Anthropocene. -  
678 Science Advances 6: eaay7650.
- 679 Redding, D. W. and Mooers, A. Ø. 2006. Incorporating Evolutionary Measures into  
680 Conservation Prioritization. - Conservation Biology 20: 1670–1678.

- 681 Ricciardi, A. and Rasmussen, J. B. 1999. Extinction Rates of North American Freshwater  
682 Fauna. - *Conservation Biology* 13: 1220–1222.
- 683 Rondinini, C. et al. 2014. Update or Outdate: Long-Term Viability of the IUCN Red List. -  
684 *Conservation Letters* 7: 126–130.
- 685 Silvestro, D. et al. 2019. Improved estimation of macroevolutionary rates from fossil data  
686 using a Bayesian framework. - *Paleobiology* 45: 546–570.
- 687 Swinnerton, K. J. 2001. The ecology and conservation of the pink pigeon *Columba mayeri* in  
688 Mauritius.
- 689 Veron, S. et al. 2016. Integrating data-deficient species in analyses of evolutionary history  
690 loss. - *Ecology and Evolution* 6: 8502–8514.
- 691
- 692

693 **Tables**

694 **Table 1:** Status transitions counted in the IUCN history of birds (class Aves) between 2011-  
695 2020. For example, the empirical count of transitions from status LC to NT is 182, while the  
696 count of transitions from NT to LC is 112. The count for transitions from CR to EX changes  
697 from 6 to 20 when modeling species that are possibly extinct according to IUCN (PEX) as  
698 EX.

|       | LC  | NT  | VU | EN | CR | DD | EW/EX   |
|-------|-----|-----|----|----|----|----|---------|
| LC    | 0   | 182 | 77 | 18 | 3  | 1  | 0       |
| NT    | 112 | 0   | 73 | 24 | 3  | 1  | 0       |
| VU    | 18  | 82  | 0  | 99 | 13 | 1  | 0       |
| EN    | 1   | 15  | 69 | 0  | 50 | 0  | 0       |
| CR    | 0   | 2   | 9  | 42 | 0  | 0  | 6 (+14) |
| DD    | 8   | 12  | 5  | 2  | 0  | 0  | 0       |
| EW/EX | 0   | 0   | 0  | 0  | 2  | 0  | 0       |

699

700



701 **Table 2:** Status transitions rates estimated for birds (class Aves) that were used for future  
702 simulations. The q-matrix below shows the mean of the transition rate estimates across the q-  
703 matrix replicates for all bird species, scaled in transitions per species-year (T/SY). The  
704 transition rates between all extant statuses were estimated from the counted transitions in the  
705 IUCN history of birds (**Table 1**), taking into account the total cumulative time across all bird  
706 species spent in each category. The EX transition rates are shown for both approaches, the  
707 critE EX mode and the empirical EX mode (including PEX taxa), respectively.

|        | LC         | NT         | VU         | EN         | CR         | EX                      |
|--------|------------|------------|------------|------------|------------|-------------------------|
| LC     | -          | 0.00146420 | 0.00063157 | 0.00015742 | 0.00003312 | 0.00000016 / 0.00000794 |
| NT     | 0.00755463 | -          | 0.00491179 | 0.00161410 | 0.00025690 | 0.00004155 / 0.00006458 |
| VU     | 0.00164326 | 0.00691254 | -          | 0.00831167 | 0.00114747 | 0.00105305 / 0.00007353 |
| EN     | 0.00030274 | 0.00248436 | 0.01058826 | -          | 0.00757056 | 0.00900926 / 0.00014377 |
| 708 CR | 0.00033174 | 0.00100060 | 0.00319970 | 0.01443416 | -          | 0.04767378 / 0.00654700 |

709

710 **Figures**

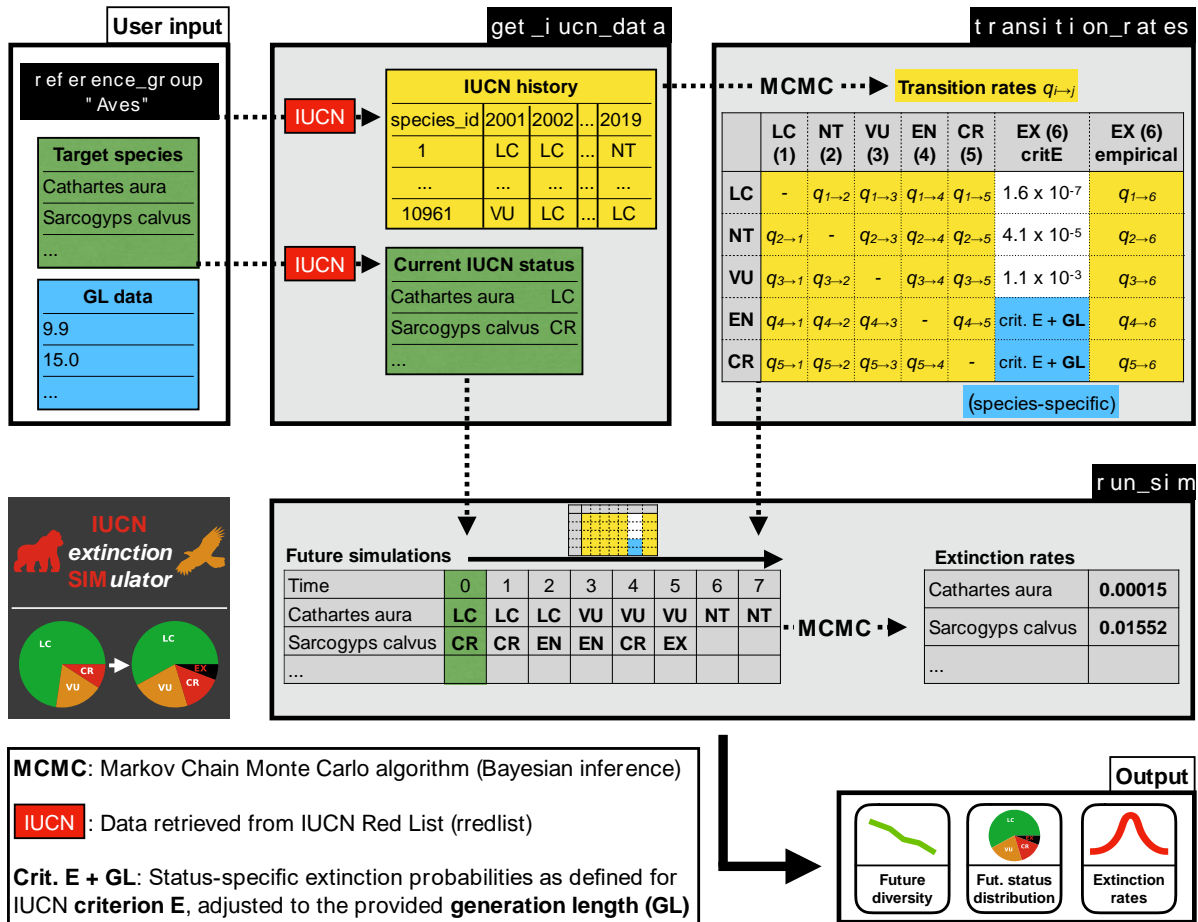

711

712 **Figure 1:** Workflow of *iucn\_sim* to simulate future extinctions and estimate extinction rates.  
 713 The only required input by the user is a) the list of target species whose future extinctions are  
 714 supposed to be simulated and b) the name of a reference group, which will be used to  
 715 estimate status transition rates based on the recorded IUCN history of this group. Optionally  
 716 the user can provide generation length (GL) estimates for each target species, which will be  
 717 considered when calculating the extinction risks associated with the statuses EN and CR,  
 718 according to IUCN criterion E (critE EX mode). Alternatively, the user can choose the  
 719 empirical EX mode, in which case extinction risks will be estimated from the empirically  
 720 observed extinctions in the IUCN history of the reference group. The modeled extinction  
 721 risks and the status transition rates will be stored in a q-matrix, which is used to simulate  
 722 future status changes and extinctions for all target species. Finally, the program estimates  
 723 species-specific extinction rates from the simulated extinction times (typically from multiple  
 724 simulation replicates) and produces various summary statistics and plots as output, including  
 725 the simulated future status distribution of the target group, the future diversity trajectory, and  
 726 the histograms of simulated extinction times and extinction rate estimates for each species.

a) Present status distribution

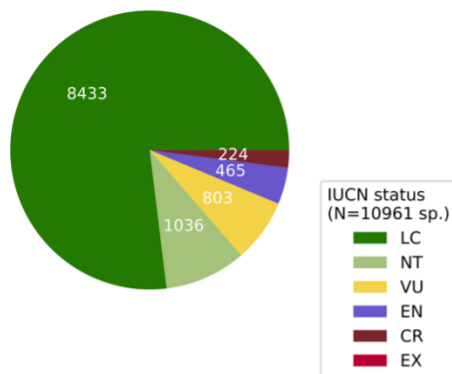

b) Simulated diversity trajectory

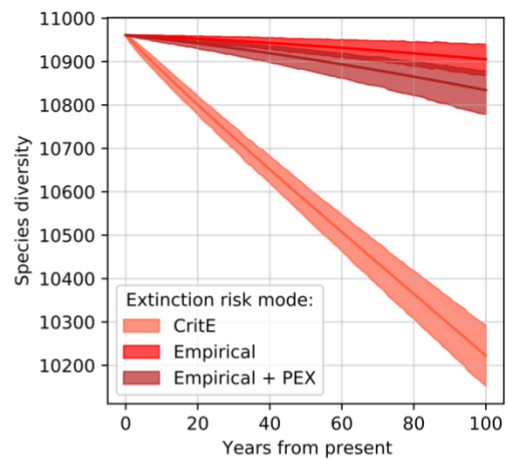

c) Status distribution in 100 years

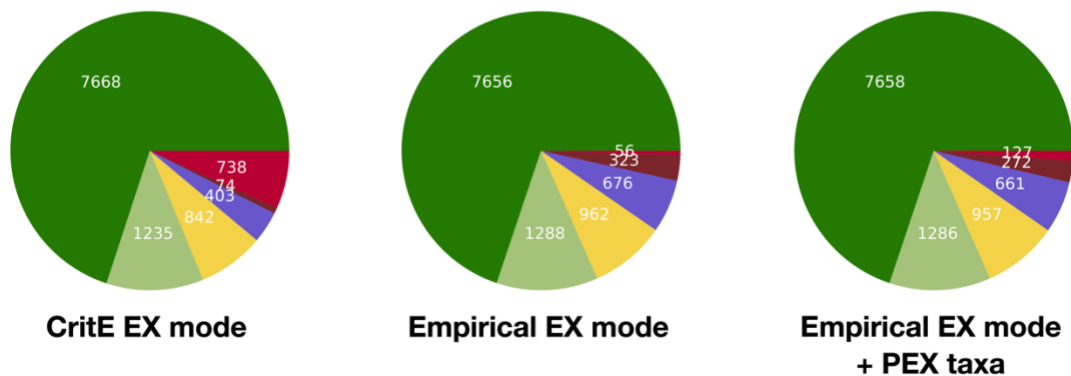

727

728 **Figure 2:** Future diversity trajectory and IUCN status distribution for birds. We simulated  
 729 future extinctions with three different approaches of modeling extinction risks: the critE EX  
 730 mode, the empirical EX mode, and the empirical EX mode including the modeling of PEX  
 731 species as extinct. Panel a) shows the current IUCN threat status distribution of all bird  
 732 species. Panel b) shows the future diversity trajectory over the next 100 years, based on  
 733 future extinctions simulated with *iucn\_sim* under the 3 different extinction risk scenarios.  
 734 Panel (c) shows the future IUCN status distribution in 100 years simulated with *iucn\_sim*.  
 735 Note that the y-axis in the diversity through time plots only displays a selected diversity  
 736 range starting at 10,000 (displayed range does not cover the value 0). All panels represent  
 737 graphic output options available in *iucn\_sim*.

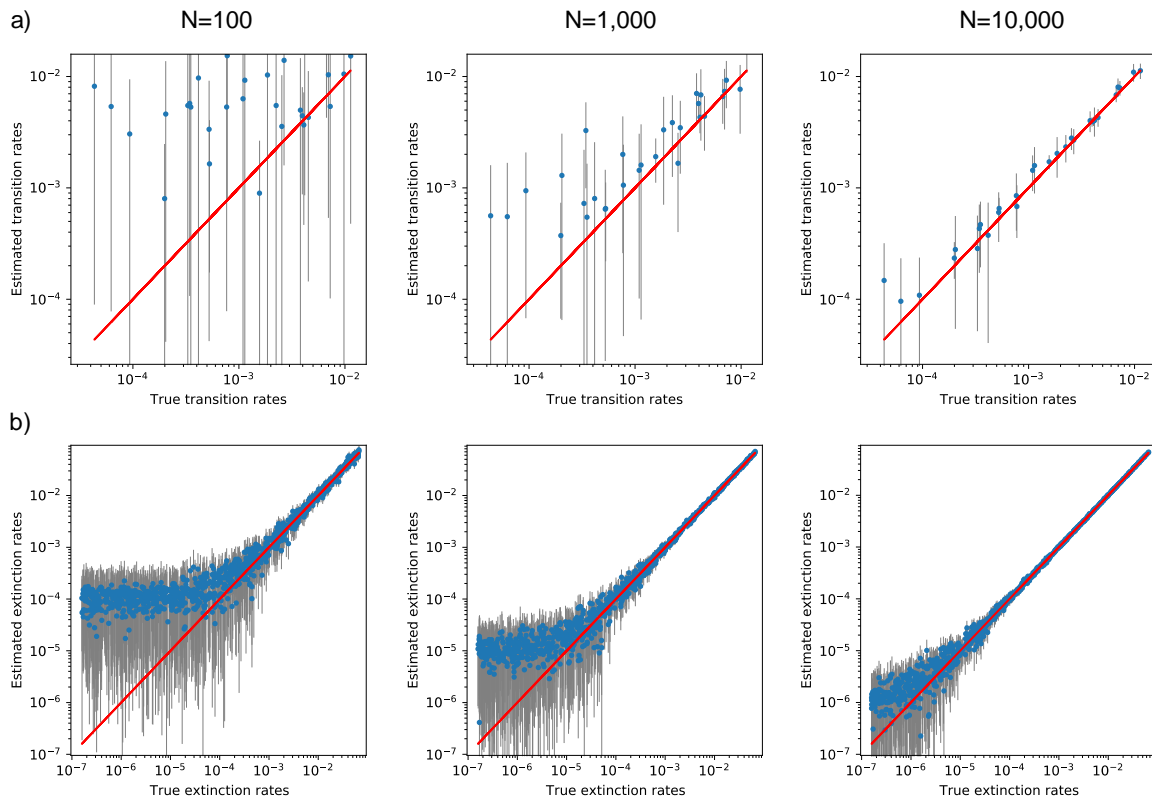

738

739 **Figure 3:** Accuracy of rate estimations improves with higher sample sizes. The scatter-plots  
740 show the status transition rates (a) and the extinction rates (b), estimated from synthetic data  
741 that was simulated in this study under known rates. We plotted the mean values (blue dots)  
742 and the 95% credible interval (grey vertical lines) of the rates sampled by MCMC (y-axis)  
743 against the true rates (x-axis) to evaluate the accuracy under different sample sizes (see plot  
744 titles). The sample size in case of the status transition rates (a) constitutes the number of  
745 species in the reference group, while sample size for extinction rates represents the number of  
746 future simulations for each species. Rate estimates close to the diagonal red line show high  
747 accuracy, while small error bars show high precision. Status transition rates estimated for  
748 reference groups of only 100 species show very low accuracy and therefore it is  
749 recommended to choose reference groups of at least 1,000 or more species. The dotted  
750 horizontal line in the extinction rate plots (b) shows the minimum empirical extinction rate  
751 estimate for the bird data ( $\sim 1 \times 10^{-5}$ ). Extinction rates far below this line are therefore  
752 unlikely to occur in empirical data sets. Running at least 10,000 simulation replicates ensures  
753 accurate and precise extinction rate estimates.

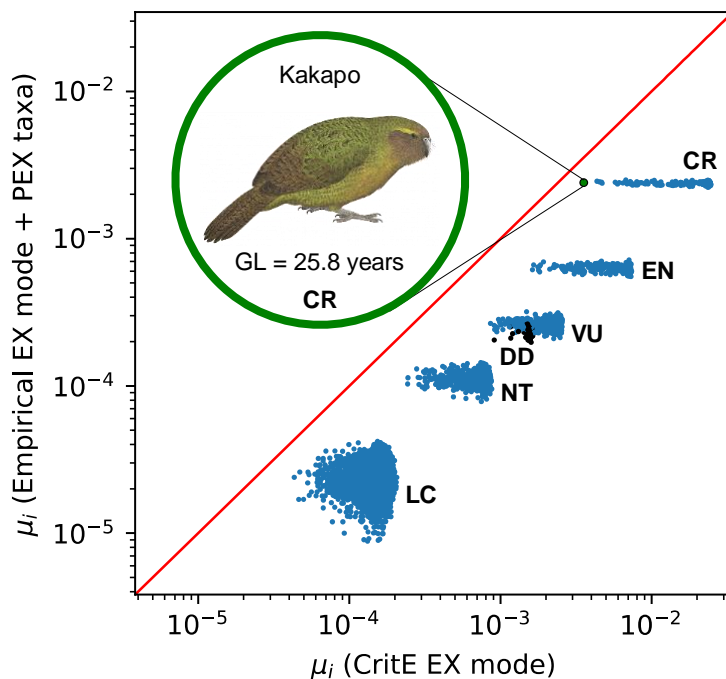

754

755 **Figure 4:** Species-specific extinction rates for the two *iucn\_sim* approaches of modeling EX  
756 transition rates. The x-axis shows the estimated rates for the critE EX mode approach (all  
757 rates scaled in extinctions per species-years - ESY). The y-axis shows the estimated rates for  
758 the empirical EX mode approach including PEX taxa modeling. The rates estimated from the  
759 empirical EX mode approach are consistently lower than those from the critE EX mode  
760 approach. Species with the same IUCN status at present end up with similar rate estimates,  
761 forming visible clusters in the plot. However, there is some observed variation in the  
762 estimates between species of the same status, which is present in the estimates of both  
763 approaches (x and y-axis). This variation is partly caused by the stochasticity in our  
764 simulation approach. But particularly for the more threatened categories EN and CR we find  
765 additional variation among the critE EX mode rate estimates that is not present on the y-axis,  
766 causing the elongated shapes of these clusters as opposed to the round shapes of the less  
767 threatened status clusters. This is caused by differences in the GL values of individual  
768 species, leading to smaller extinction rate estimates for species with long generation times, as  
769 highlighted exemplarily for the CR Kakapo (*Strigops habroptila*), with one of the longest  
770 generation lengths in our dataset (25.8 years), which places on the very low rate end of the  
771 CR extinction rate cluster. In our approach DD species (black dots) are being modeled based  
772 on the observed DD transition rates in the IUCN history of the reference group, which in the  
773 case of birds results in extinction rate estimates similar to those of VU species. The  
774 illustration was provided by the Handbook of the birds of the world alive (Collar, N. et al.  
775 2020).

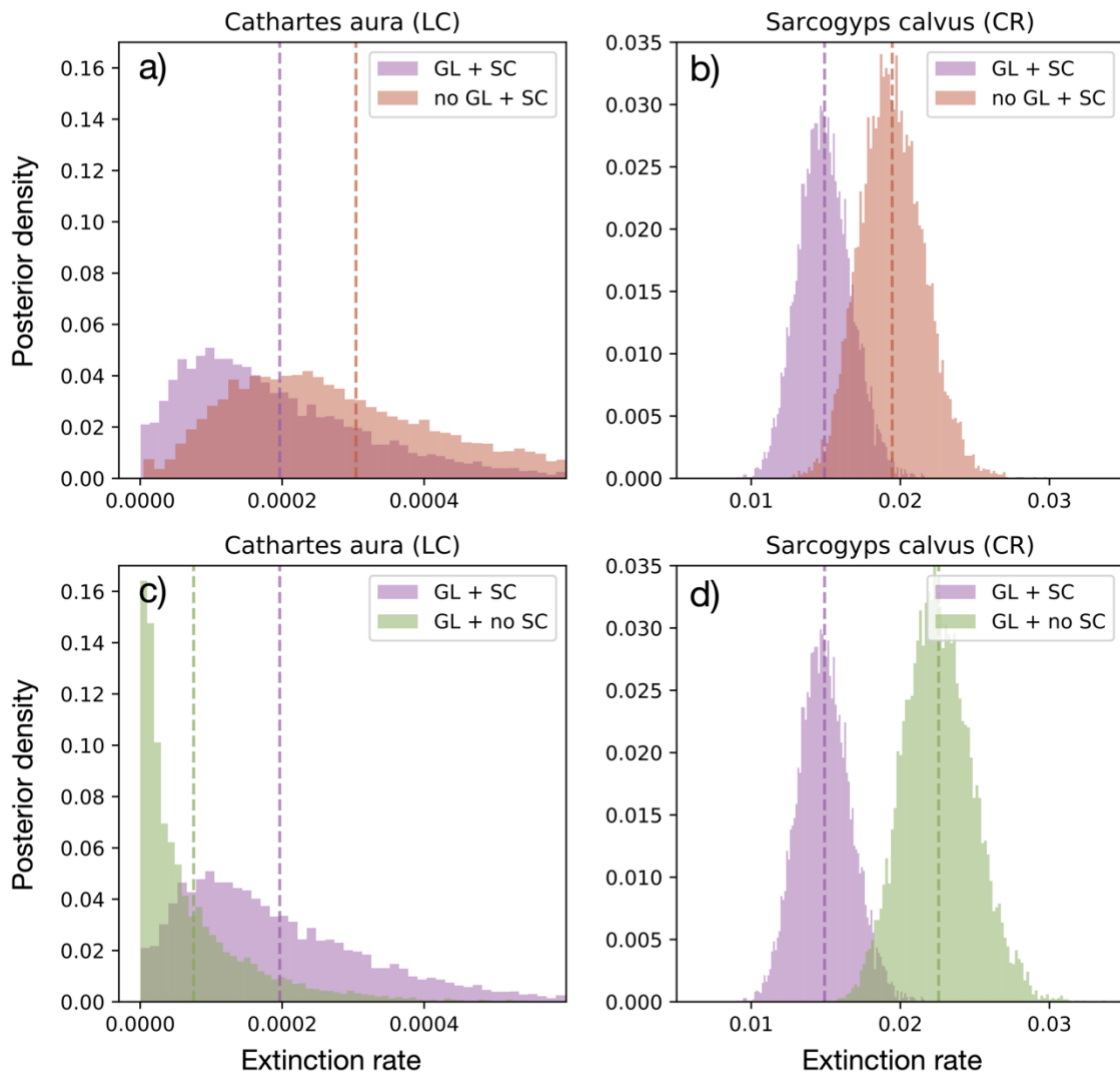

776

777 **Figure 5:** The effect of generation length (GL) and status-change (SC) on estimated  
778 extinction rates. The plots show histograms of the posterior density of extinction rates  
779 estimated with *iucn\_sim* for two different species: the Turkey Vulture (*Cathartes aura*, GL =  
780 9.9 years, LC), panels a) and c); and the Red-headed Vulture (*Sarcogyps calvus*, GL = 15  
781 years, CR), panels b) and d). Upper panels show that the extinction rate estimates slightly  
782 decrease when including GL data into the simulations (purple) compared to ignoring GL data  
783 (red) for both LC and CR species. Bottom panels show that accounting for future changes of  
784 IUCN statuses slightly increases the extinction rate of LC species, but leads to a decrease for  
785 CR species (d). Note that the effect of future status changes on extinction rates depends on  
786 the estimated status transition rates and is therefore expected to change depending on the  
787 chosen reference group.

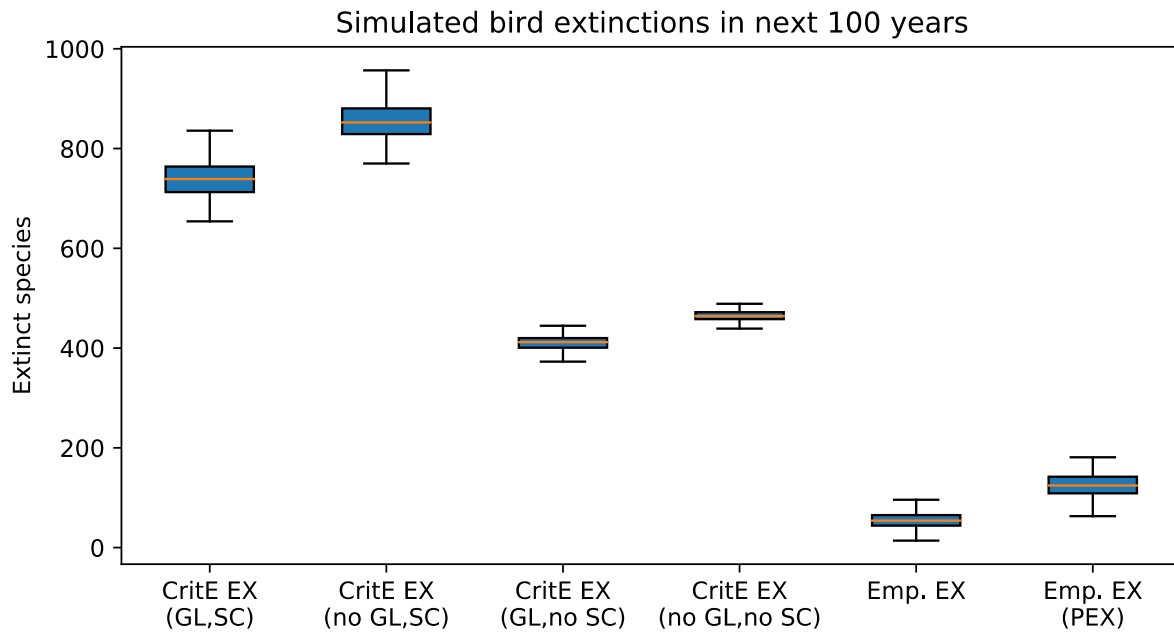

788

789 **Figure 6:** Number of predicted extinctions for birds in the next 100 years under different  
790 simulation scenarios across 100 simulation replicates. The blue boxes show the lower to  
791 upper quartile values of the predicted extinctions, with an orange line at the median. The  
792 whiskers show the full range of the predictions. Including generation length (GL) and  
793 conservation status changes (SC) into future simulations, leads to a significant increase in the  
794 number of predicted extinctions, compared to ignoring this information (compare first and  
795 fourth box plot column). The individual effect of adding GL information to the simulations is  
796 a decrease of the predicted extinctions (third box-plot column), while only modeling SC leads  
797 to very high numbers of predicted extinctions (second box-plot column). The last two  
798 columns show the range of predicted extinctions for the empirical EX mode approach, with  
799 (column 5) and without PEX taxa (column 6). The estimates for both empirical EX mode  
800 approaches are significantly lower than those for any of the variations of the critE EX mode  
801 approach (columns 1-4).



### User input

reference\_group  
"Aves"

#### Target species

Cathartes aura  
Sarcogyps calvus  
...

#### GL data

9.9  
15.0  
...

### get\_iucn\_data

IUCN

#### IUCN history

| species_id | 2001 | 2002 | ... | 2019 |
|------------|------|------|-----|------|
| 1          | LC   | LC   | ... | NT   |
| ...        | ...  | ...  | ... | ...  |
| 10961      | VU   | LC   | ... | LC   |

IUCN

#### Current IUCN status

Cathartes aura LC  
Sarcogyps calvus CR  
...

### transition\_rates

MCMC

Transition rates  $q_{i \rightarrow j}$

|    | LC (1)                | NT (2)                | VU (3)                | EN (4)                | CR (5)                | EX (6) critE         | EX (6) empirical      |
|----|-----------------------|-----------------------|-----------------------|-----------------------|-----------------------|----------------------|-----------------------|
| LC | -                     | $q_{1 \rightarrow 2}$ | $q_{1 \rightarrow 3}$ | $q_{1 \rightarrow 4}$ | $q_{1 \rightarrow 5}$ | $1.6 \times 10^{-7}$ | $q_{1 \rightarrow 6}$ |
| NT | $q_{2 \rightarrow 1}$ | -                     | $q_{2 \rightarrow 3}$ | $q_{2 \rightarrow 4}$ | $q_{2 \rightarrow 5}$ | $4.1 \times 10^{-5}$ | $q_{2 \rightarrow 6}$ |
| VU | $q_{3 \rightarrow 1}$ | $q_{3 \rightarrow 2}$ | -                     | $q_{3 \rightarrow 4}$ | $q_{3 \rightarrow 5}$ | $1.1 \times 10^{-3}$ | $q_{3 \rightarrow 6}$ |
| EN | $q_{4 \rightarrow 1}$ | $q_{4 \rightarrow 2}$ | $q_{4 \rightarrow 3}$ | -                     | $q_{4 \rightarrow 5}$ | crit. E + GL         | $q_{4 \rightarrow 6}$ |
| CR | $q_{5 \rightarrow 1}$ | $q_{5 \rightarrow 2}$ | $q_{5 \rightarrow 3}$ | $q_{5 \rightarrow 4}$ | -                     | crit. E + GL         | $q_{5 \rightarrow 6}$ |

(species-specific)

### run\_sim

#### Future simulations

| Time             | 0  | 1  | 2  | 3  | 4  | 5  | 6  | 7  |
|------------------|----|----|----|----|----|----|----|----|
| Cathartes aura   | LC | LC | LC | VU | VU | VU | NT | NT |
| Sarcogyps calvus | CR | CR | EN | EN | CR | EX |    |    |
| ...              |    |    |    |    |    |    |    |    |

MCMC

#### Extinction rates

|                  |         |
|------------------|---------|
| Cathartes aura   | 0.00015 |
| Sarcogyps calvus | 0.01552 |
| ...              |         |

IUCN extinction SIMulator

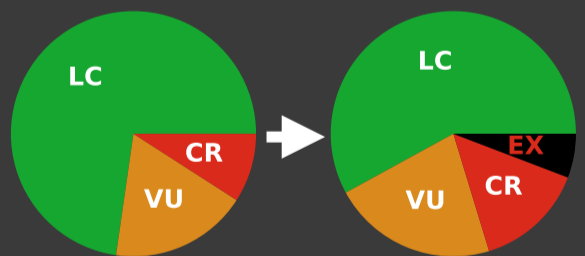

**MCMC**: Markov Chain Monte Carlo algorithm (Bayesian inference)

**IUCN**: Data retrieved from IUCN Red List (rredlist)

**Crit. E + GL**: Status-specific extinction probabilities as defined for IUCN criterion E, adjusted to the provided generation length (GL)

### Output

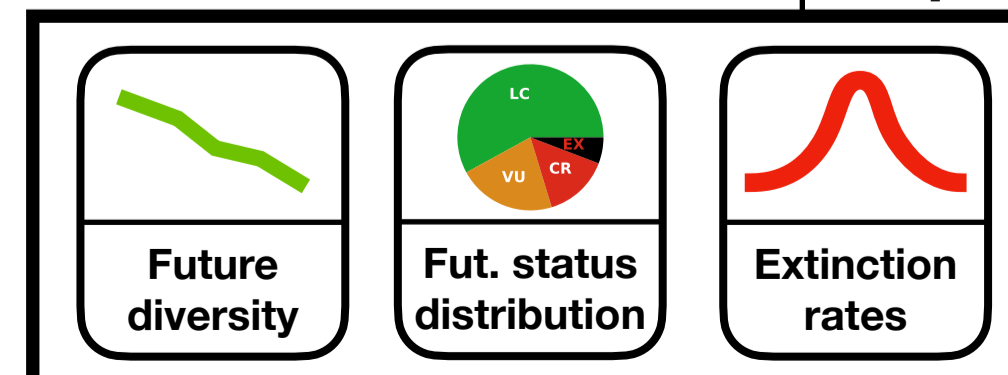



### a) Present status distribution

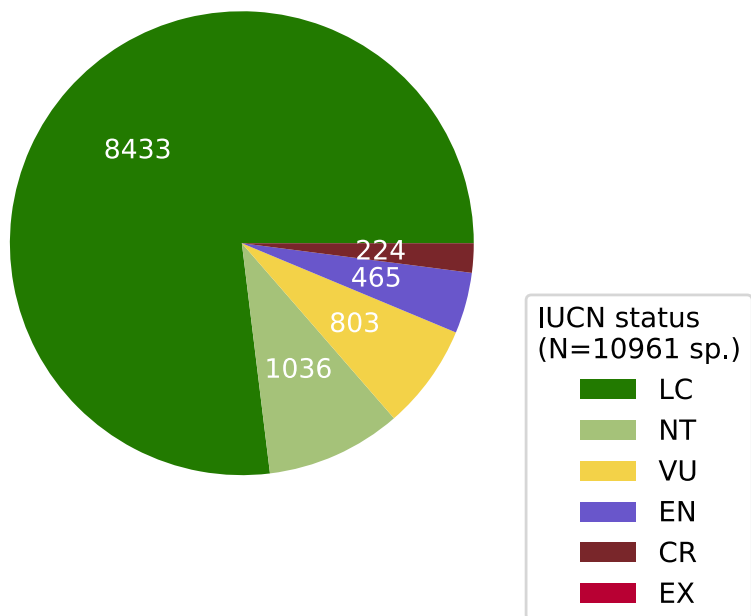

### b) Simulated diversity trajectory

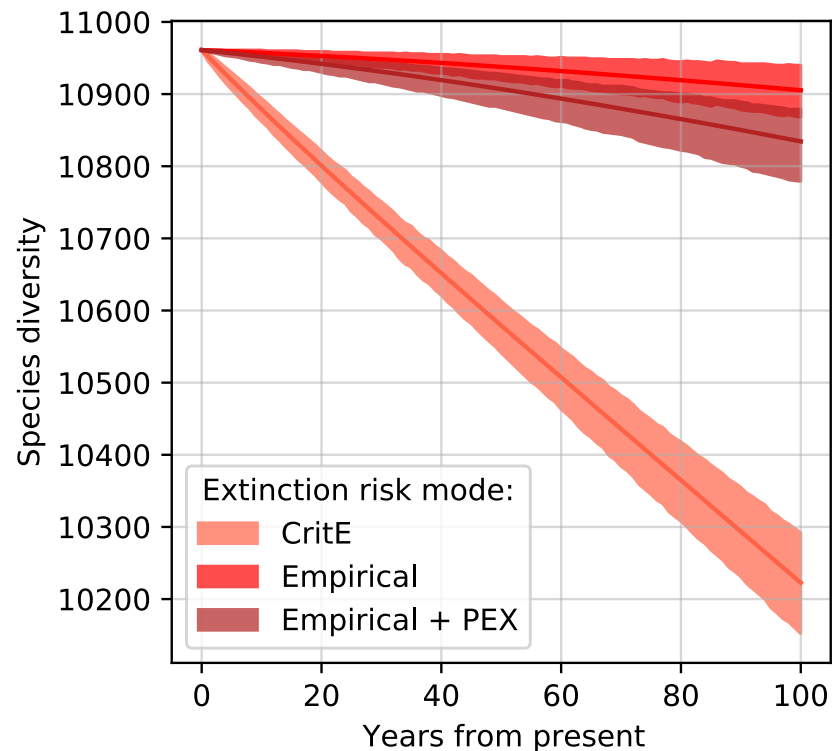

### c) Status distribution in 100 years

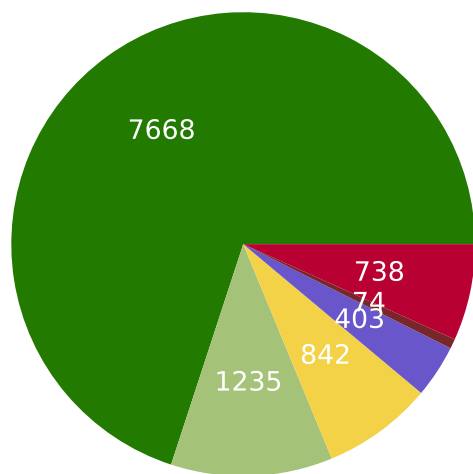

**CritE EX mode**

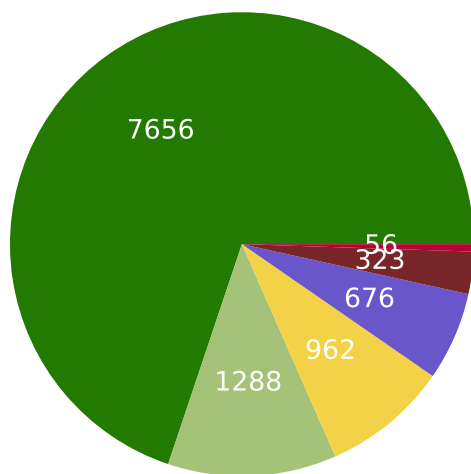

**Empirical EX mode**

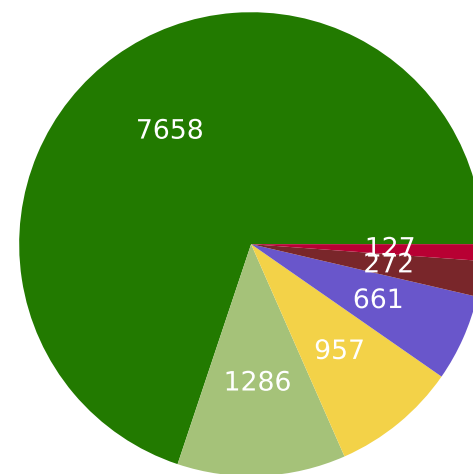

**Empirical EX mode  
+ PEX taxa**

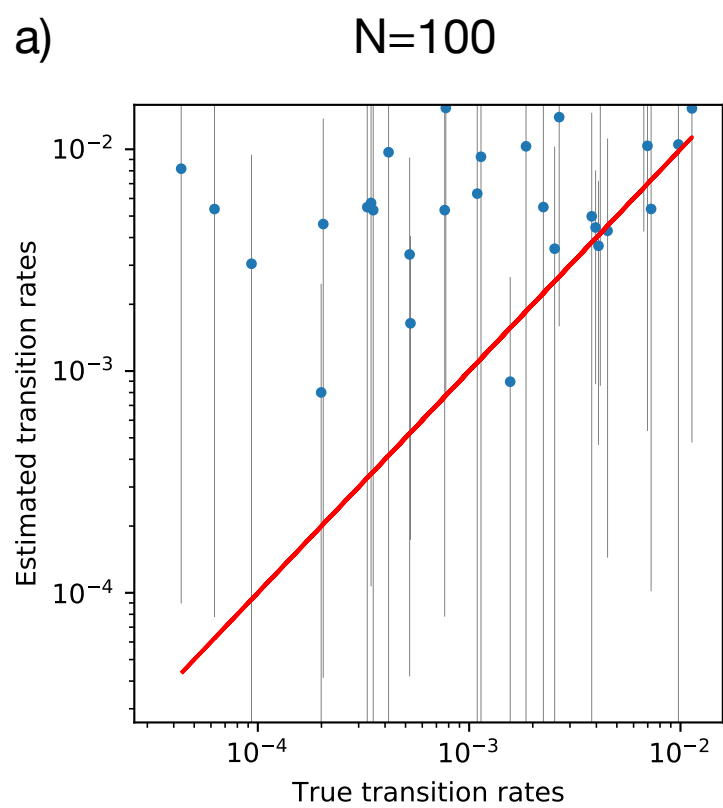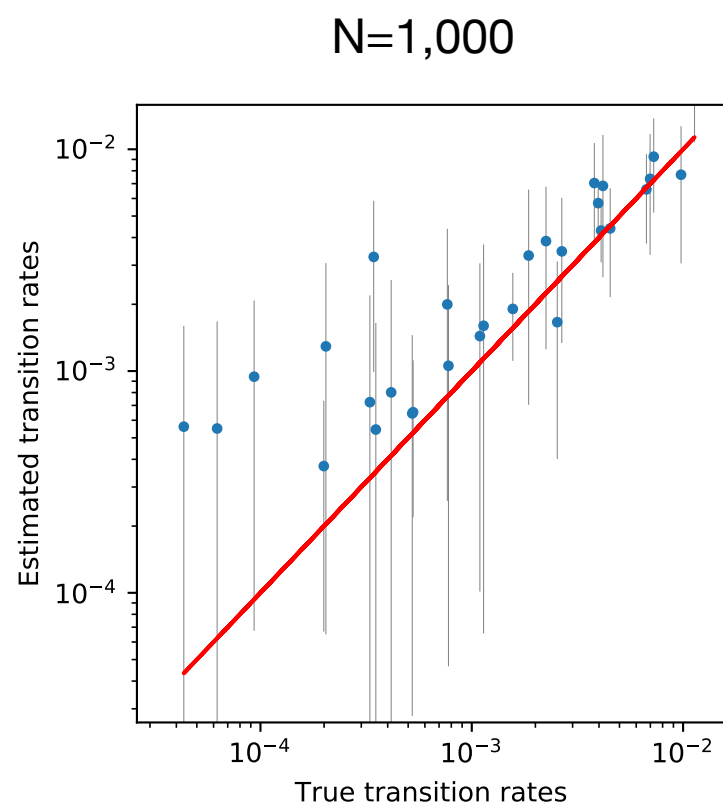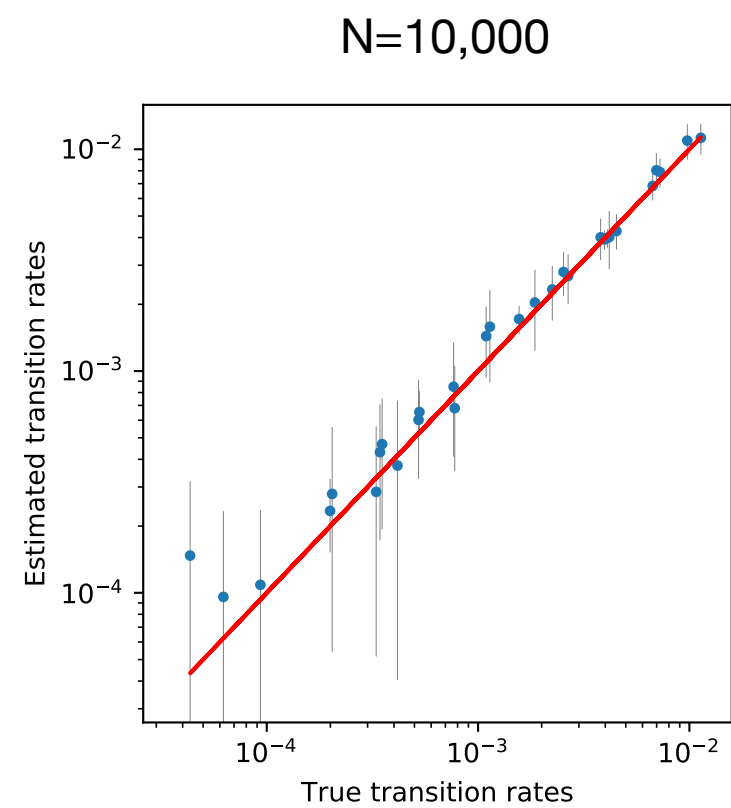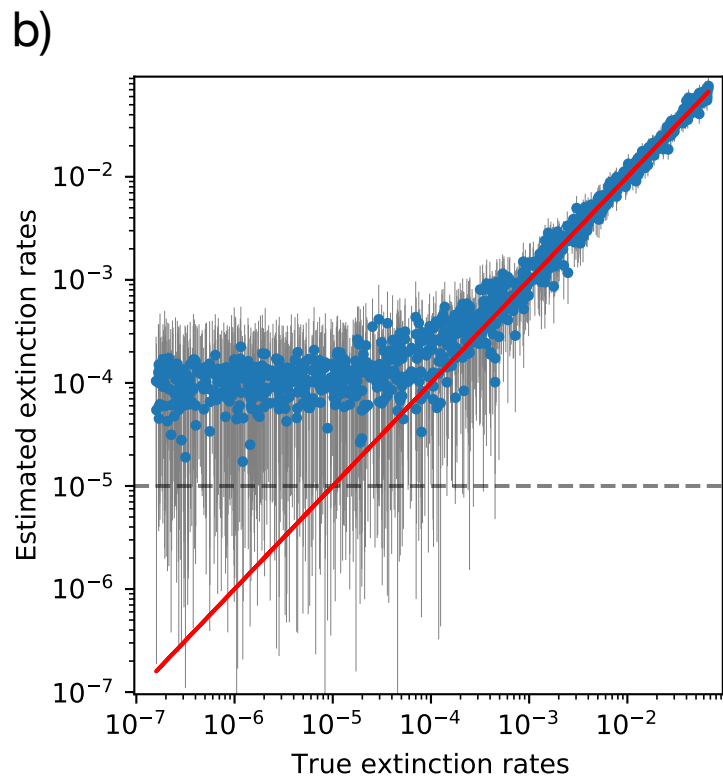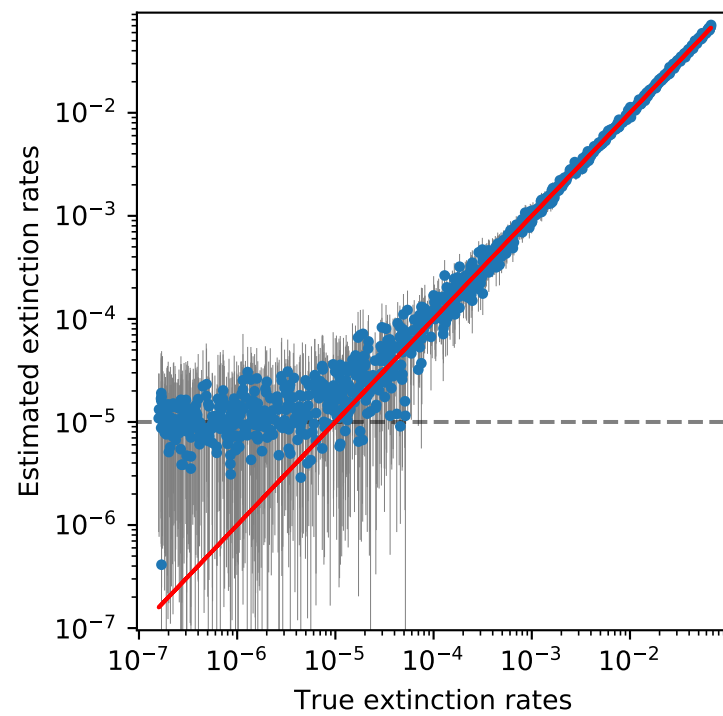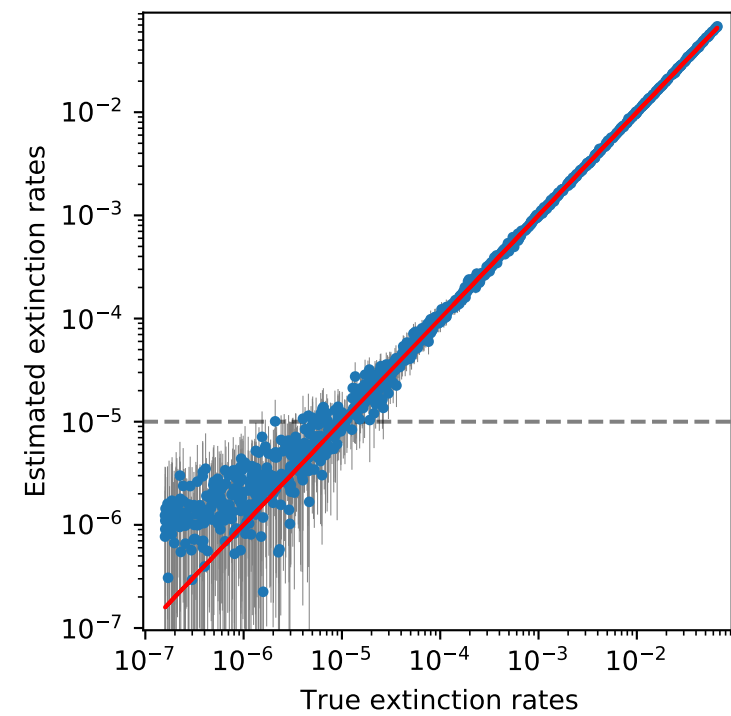

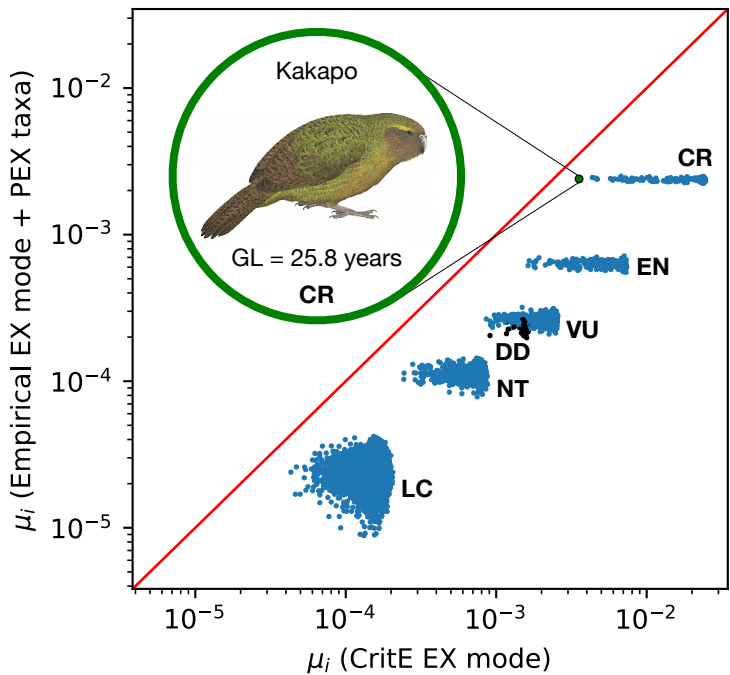

Cathartes aura (LC)

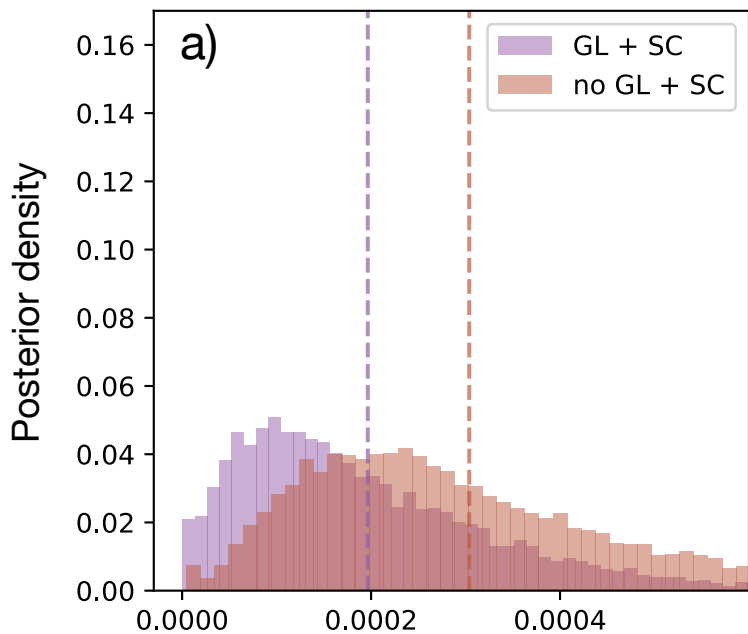

Sarcogyps calvus (CR)

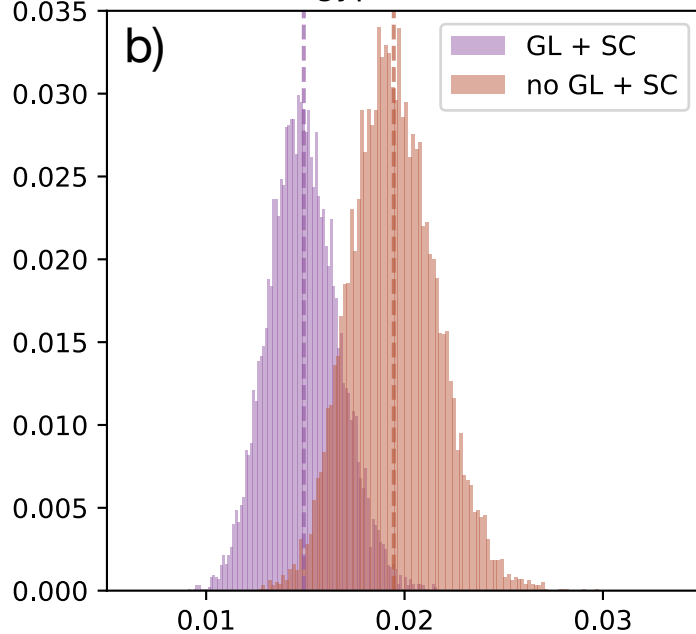

Cathartes aura (LC)

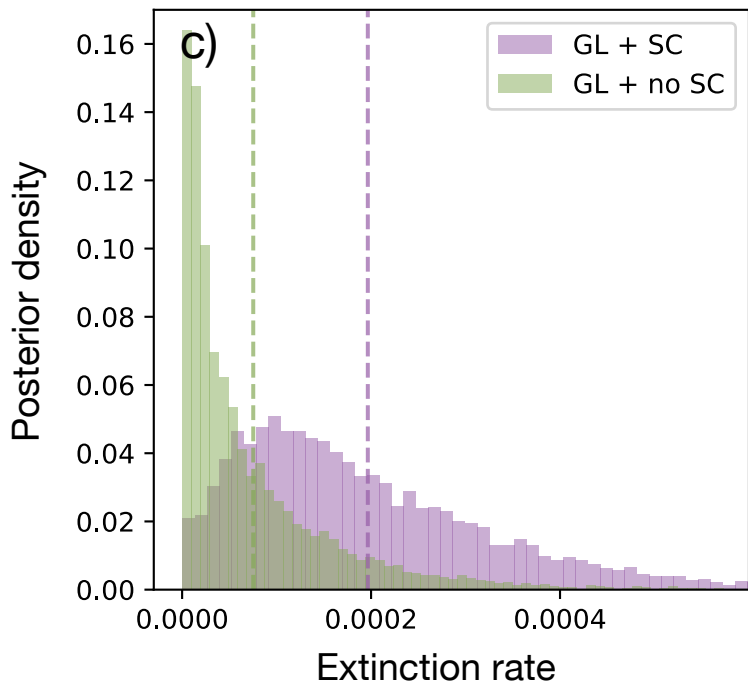

Sarcogyps calvus (CR)

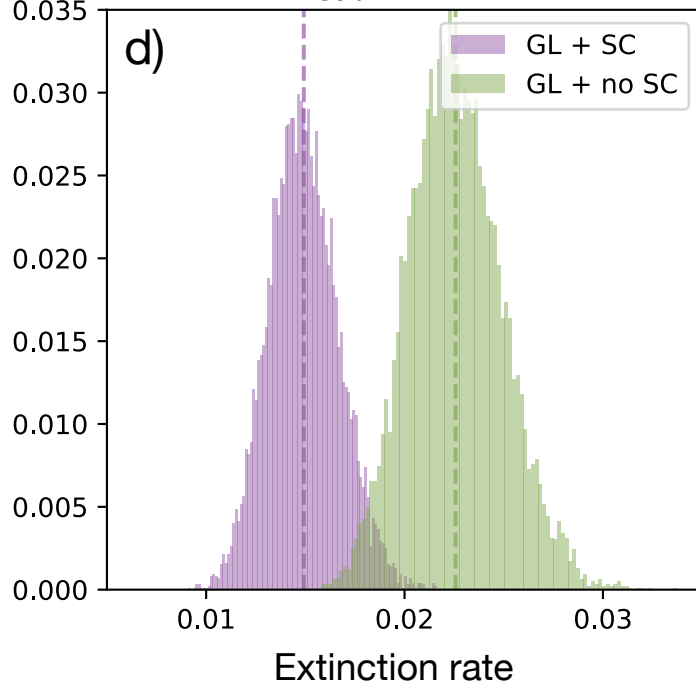

Simulated bird extinctions in next 100 years

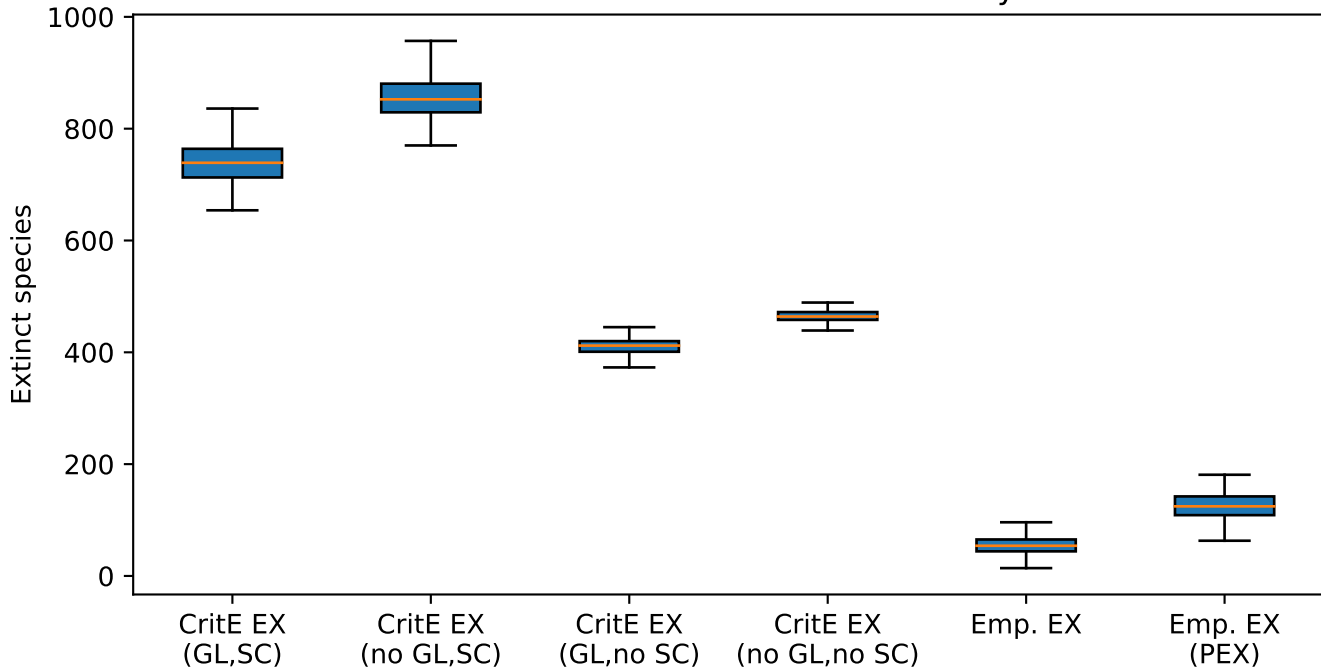

Source: https://www.biorxiv.org/content/10.1101/2019.12.16.878249v3.full.pdf
